# Supplementary material
Source: PubMed Central journal article supplement (PMC3383123)
Supplement: bi300299z_si_002.pdf [file bi300299z_si_002.pdf]

**Table S2. Listing of 3.5 Å close contacts between amino acids of human P-glycoprotein and docked ligands.**

Any contact between protein and ligand that was less than or equal to 3.5 Å is listed in the table under its contacted amino acid number, the nonredundant molecular dynamics frame number from which the contact was detected, and the contacted Pgp residue type, number and helix.

| Contact residue/<br>ligand | MD trajectory<br>frame number | Pgp amino<br>acid residue | Pgp residue<br>number | Helix number |
|----------------------------|-------------------------------|---------------------------|-----------------------|--------------|
| 60                         |                               |                           |                       |              |
| biricodar                  | 22                            | ILE                       | 60                    | 1            |
| cyclosporinA               | 18                            | ILE                       | 60                    | 1            |
| cyclosporinA               | 20                            | ILE                       | 60                    | 1            |
| cyclosporinA               | 21                            | ILE                       | 60                    | 1            |
| paclitaxel                 | 15                            | ILE                       | 60                    | 1            |
| paclitaxel                 | 17                            | ILE                       | 60                    | 1            |
| valspodar                  | 17                            | ILE                       | 60                    | 1            |
| valspodar                  | 19                            | ILE                       | 60                    | 1            |
| valspodar                  | 20                            | ILE                       | 60                    | 1            |
| valspodar                  | 21                            | ILE                       | 60                    | 1            |
|                            |                               |                           |                       |              |
| 63                         |                               |                           |                       |              |
| cisZ-<br>flupenthixol      | 18                            | ALA                       | 63                    | 1            |
| cyclosporinA               | 18                            | ALA                       | 63                    | 1            |
| cyclosporinA               | 20                            | ALA                       | 63                    | 1            |
| doxorubicin                | 18                            | ALA                       | 63                    | 1            |
| elacridar                  | 24                            | ALA                       | 63                    | 1            |
| elacridar                  | 25                            | ALA                       | 63                    | 1            |
| lopinavir                  | 15                            | ALA                       | 63                    | 1            |
| paclitaxel                 | 15                            | ALA                       | 63                    | 1            |
| paclitaxel                 | 17                            | ALA                       | 63                    | 1            |
| paclitaxel                 | 24                            | ALA                       | 63                    | 1            |
| paclitaxel                 | 25                            | ALA                       | 63                    | 1            |
| QZ59S_RRR                  | 14                            | ALA                       | 63                    | 1            |
| QZ59S_SSS                  | 23                            | ALA                       | 63                    | 1            |
| rhodamine123               | 19                            | ALA                       | 63                    | 1            |
| saquinavir                 | 25                            | ALA                       | 63                    | 1            |
| valspodar                  | 21                            | ALA                       | 63                    | 1            |
| verapamil                  | 18                            | ALA                       | 63                    | 1            |
|                            |                               |                           |                       |              |
| 64                         |                               |                           |                       |              |
| biricodar                  | 22                            | GLY                       | 64                    | 1            |
| cyclosporinA               | 18                            | GLY                       | 64                    | 1            |
| cyclosporinA               | 20                            | GLY                       | 64                    | 1            |
| cyclosporinA               | 21                            | GLY                       | 64                    | 1            |
| paclitaxel                 | 15                            | GLY                       | 64                    | 1            |
| paclitaxel                 | 17                            | GLY                       | 64                    | 1            |
| valspodar                  | 17                            | GLY                       | 64                    | 1            |
| valspodar                  | 19                            | GLY                       | 64                    | 1            |

|                   |    |     |    |   |
|-------------------|----|-----|----|---|
| valspodar         | 20 | GLY | 64 | 1 |
| valspodar         | 21 | GLY | 64 | 1 |
|                   |    |     |    |   |
| 68                |    |     |    |   |
| biricodar         | 2  | MET | 68 | 1 |
| biricodar         | 10 | MET | 68 | 1 |
| biricodar         | 11 | MET | 68 | 1 |
| biricodar         | 22 | MET | 68 | 1 |
| cisZ-flupenthixol | 0  | MET | 68 | 1 |
| cisZ-flupenthixol | 4  | MET | 68 | 1 |
| cyclosporinA      | 9  | MET | 68 | 1 |
| cyclosporinA      | 20 | MET | 68 | 1 |
| cyclosporinA      | 21 | MET | 68 | 1 |
| daunorubicin      | 2  | MET | 68 | 1 |
| daunorubicin      | 10 | MET | 68 | 1 |
| doxorubicin       | 1  | MET | 68 | 1 |
| doxorubicin       | 2  | MET | 68 | 1 |
| doxorubicin       | 3  | MET | 68 | 1 |
| doxorubicin       | 9  | MET | 68 | 1 |
| elacridar         | 1  | MET | 68 | 1 |
| elacridar         | 2  | MET | 68 | 1 |
| elacridar         | 3  | MET | 68 | 1 |
| elacridar         | 4  | MET | 68 | 1 |
| elacridar         | 6  | MET | 68 | 1 |
| elacridar         | 7  | MET | 68 | 1 |
| elacridar         | 10 | MET | 68 | 1 |
| hoechst33342      | 0  | MET | 68 | 1 |
| hoechst33342      | 8  | MET | 68 | 1 |
| hoechst33342      | 9  | MET | 68 | 1 |
| hoechst33342      | 12 | MET | 68 | 1 |
| ivermectin        | 2  | MET | 68 | 1 |
| ivermectin        | 3  | MET | 68 | 1 |
| ivermectin        | 6  | MET | 68 | 1 |
| ivermectin        | 8  | MET | 68 | 1 |
| lopinavir         | 10 | MET | 68 | 1 |
| lopinavir         | 11 | MET | 68 | 1 |
| paclitaxel        | 7  | MET | 68 | 1 |
| paclitaxel        | 15 | MET | 68 | 1 |
| paclitaxel        | 17 | MET | 68 | 1 |
| QZ59S_RRR         | 9  | MET | 68 | 1 |
| QZ59S_RRR         | 14 | MET | 68 | 1 |
| QZ59S_SSS         | 5  | MET | 68 | 1 |
| rhodamine123      | 10 | MET | 68 | 1 |
| ritonavir         | 4  | MET | 68 | 1 |
| ritonavir         | 17 | MET | 68 | 1 |
| saquinavir        | 3  | MET | 68 | 1 |
| saquinavir        | 7  | MET | 68 | 1 |
| saquinavir        | 10 | MET | 68 | 1 |
| tamoxifen         | 2  | MET | 68 | 1 |
| tamoxifen         | 3  | MET | 68 | 1 |

|                       |    |     |     |   |
|-----------------------|----|-----|-----|---|
| tamoxifen             | 10 | MET | 68  | 1 |
| tariquidar            | 6  | MET | 68  | 1 |
| tariquidar            | 10 | MET | 68  | 1 |
| valspodar             | 7  | MET | 68  | 1 |
| valspodar             | 17 | MET | 68  | 1 |
| valspodar             | 19 | MET | 68  | 1 |
| valspodar             | 21 | MET | 68  | 1 |
| verapamil             | 2  | MET | 68  | 1 |
| verapamil             | 3  | MET | 68  | 1 |
| vinblastine           | 6  | MET | 68  | 1 |
| vinblastine           | 7  | MET | 68  | 1 |
| vinblastine           | 8  | MET | 68  | 1 |
| vinblastine           | 9  | MET | 68  | 1 |
| vinblastine           | 10 | MET | 68  | 1 |
| zosuquidar            | 1  | MET | 68  | 1 |
| zosuquidar            | 3  | MET | 68  | 1 |
| zosuquidar            | 4  | MET | 68  | 1 |
|                       |    |     |     |   |
| 218                   |    |     |     |   |
| tamoxifen             | 24 | ILE | 218 | 4 |
|                       |    |     |     |   |
| 222                   |    |     |     |   |
| tamoxifen             | 24 | SER | 222 | 4 |
|                       |    |     |     |   |
| 300                   |    |     |     |   |
| biricodar             | 1  | GLY | 300 | 5 |
| biricodar             | 3  | GLY | 300 | 5 |
| biricodar             | 4  | GLY | 300 | 5 |
| biricodar             | 9  | GLY | 300 | 5 |
| cisZ-<br>flupenthixol | 8  | GLY | 300 | 5 |
| cisZ-<br>flupenthixol | 9  | GLY | 300 | 5 |
| cyclosporinA          | 3  | GLY | 300 | 5 |
| cyclosporinA          | 4  | GLY | 300 | 5 |
| daunorubicin          | 4  | GLY | 300 | 5 |
| daunorubicin          | 9  | GLY | 300 | 5 |
| daunorubicin          | 25 | GLY | 300 | 5 |
| doxorubicin           | 0  | GLY | 300 | 5 |
| elacridar             | 0  | GLY | 300 | 5 |
| elacridar             | 5  | GLY | 300 | 5 |
| elacridar             | 8  | GLY | 300 | 5 |
| elacridar             | 13 | GLY | 300 | 5 |
| ivermectin            | 2  | GLY | 300 | 5 |
| ivermectin            | 4  | GLY | 300 | 5 |
| ivermectin            | 5  | GLY | 300 | 5 |
| ivermectin            | 6  | GLY | 300 | 5 |
| ivermectin            | 7  | GLY | 300 | 5 |
| ivermectin            | 9  | GLY | 300 | 5 |
| lopinavir             | 2  | GLY | 300 | 5 |
| lopinavir             | 3  | GLY | 300 | 5 |
| lopinavir             | 5  | GLY | 300 | 5 |

|              |    |     |     |   |
|--------------|----|-----|-----|---|
| lopinavir    | 6  | GLY | 300 | 5 |
| lopinavir    | 7  | GLY | 300 | 5 |
| lopinavir    | 14 | GLY | 300 | 5 |
| paclitaxel   | 1  | GLY | 300 | 5 |
| paclitaxel   | 3  | GLY | 300 | 5 |
| paclitaxel   | 4  | GLY | 300 | 5 |
| paclitaxel   | 5  | GLY | 300 | 5 |
| paclitaxel   | 6  | GLY | 300 | 5 |
| paclitaxel   | 8  | GLY | 300 | 5 |
| QZ59S_RRR    | 3  | GLY | 300 | 5 |
| QZ59S_RRR    | 7  | GLY | 300 | 5 |
| QZ59S_SSS    | 4  | GLY | 300 | 5 |
| QZ59S_SSS    | 14 | GLY | 300 | 5 |
| QZ59S_SSS    | 15 | GLY | 300 | 5 |
| QZ59S_SSS    | 16 | GLY | 300 | 5 |
| rhodamine123 | 9  | GLY | 300 | 5 |
| ritonavir    | 0  | GLY | 300 | 5 |
| ritonavir    | 2  | GLY | 300 | 5 |
| ritonavir    | 5  | GLY | 300 | 5 |
| ritonavir    | 6  | GLY | 300 | 5 |
| ritonavir    | 8  | GLY | 300 | 5 |
| ritonavir    | 9  | GLY | 300 | 5 |
| ritonavir    | 14 | GLY | 300 | 5 |
| ritonavir    | 21 | GLY | 300 | 5 |
| saquinavir   | 1  | GLY | 300 | 5 |
| saquinavir   | 4  | GLY | 300 | 5 |
| saquinavir   | 5  | GLY | 300 | 5 |
| saquinavir   | 8  | GLY | 300 | 5 |
| tamoxifen    | 4  | GLY | 300 | 5 |
| tamoxifen    | 8  | GLY | 300 | 5 |
| tariquidar   | 1  | GLY | 300 | 5 |
| tariquidar   | 3  | GLY | 300 | 5 |
| tariquidar   | 4  | GLY | 300 | 5 |
| tariquidar   | 6  | GLY | 300 | 5 |
| tariquidar   | 8  | GLY | 300 | 5 |
| valspodar    | 0  | GLY | 300 | 5 |
| valspodar    | 3  | GLY | 300 | 5 |
| valspodar    | 4  | GLY | 300 | 5 |
| valspodar    | 5  | GLY | 300 | 5 |
| valspodar    | 7  | GLY | 300 | 5 |
| verapamil    | 0  | GLY | 300 | 5 |
| verapamil    | 8  | GLY | 300 | 5 |
| verapamil    | 16 | GLY | 300 | 5 |
| vinblastine  | 3  | GLY | 300 | 5 |
| vinblastine  | 4  | GLY | 300 | 5 |
| vinblastine  | 5  | GLY | 300 | 5 |
| zosuquidar   | 0  | GLY | 300 | 5 |
| zosuquidar   | 11 | GLY | 300 | 5 |
| zosuquidar   | 25 | GLY | 300 | 5 |
|              |    |     |     |   |
| 302          |    |     |     |   |
| cisZ-        | 13 | ALA | 302 | 5 |

|                   |    |     |     |   |
|-------------------|----|-----|-----|---|
| flupenthixol      |    |     |     |   |
| cisZ-flupenthixol | 14 | ALA | 302 | 5 |
| cisZ-flupenthixol | 15 | ALA | 302 | 5 |
| cisZ-flupenthixol | 16 | ALA | 302 | 5 |
| daunorubicin      | 13 | ALA | 302 | 5 |
| elacridar         | 13 | ALA | 302 | 5 |
| elacridar         | 15 | ALA | 302 | 5 |
| elacridar         | 16 | ALA | 302 | 5 |
| hoechst33342      | 15 | ALA | 302 | 5 |
| hoechst33342      | 16 | ALA | 302 | 5 |
| ivermectin        | 12 | ALA | 302 | 5 |
| ivermectin        | 16 | ALA | 302 | 5 |
| QZ59S_RRR         | 15 | ALA | 302 | 5 |
| rhodamine123      | 11 | ALA | 302 | 5 |
| rhodamine123      | 12 | ALA | 302 | 5 |
| rhodamine123      | 17 | ALA | 302 | 5 |
| ritonavir         | 14 | ALA | 302 | 5 |
| ritonavir         | 16 | ALA | 302 | 5 |
| saquinavir        | 16 | ALA | 302 | 5 |
| tamoxifen         | 11 | ALA | 302 | 5 |
| tamoxifen         | 12 | ALA | 302 | 5 |
| tamoxifen         | 16 | ALA | 302 | 5 |
| verapamil         | 12 | ALA | 302 | 5 |
| zosuquidar        | 13 | ALA | 302 | 5 |
|                   |    |     |     |   |
| 306               |    |     |     |   |
| biricodar         | 12 | ILE | 306 | 5 |
| cisZ-flupenthixol | 13 | ILE | 306 | 5 |
| cisZ-flupenthixol | 14 | ILE | 306 | 5 |
| cisZ-flupenthixol | 15 | ILE | 306 | 5 |
| cisZ-flupenthixol | 16 | ILE | 306 | 5 |
| daunorubicin      | 12 | ILE | 306 | 5 |
| daunorubicin      | 13 | ILE | 306 | 5 |
| doxorubicin       | 12 | ILE | 306 | 5 |
| elacridar         | 12 | ILE | 306 | 5 |
| lopinavir         | 12 | ILE | 306 | 5 |
| QZ59S_RRR         | 11 | ILE | 306 | 5 |
| QZ59S_RRR         | 12 | ILE | 306 | 5 |
| QZ59S_RRR         | 13 | ILE | 306 | 5 |
| QZ59S_SSS         | 12 | ILE | 306 | 5 |
| rhodamine123      | 13 | ILE | 306 | 5 |
| tamoxifen         | 16 | ILE | 306 | 5 |
| tamoxifen         | 24 | ILE | 306 | 5 |
| verapamil         | 1  | ILE | 306 | 5 |
| verapamil         | 14 | ILE | 306 | 5 |

|                   |    |     |     |   |
|-------------------|----|-----|-----|---|
| vinblastine       | 12 | ILE | 306 | 5 |
| zosuquidar        | 11 | ILE | 306 | 5 |
| zosuquidar        | 12 | ILE | 306 | 5 |
|                   |    |     |     |   |
| 332               |    |     |     |   |
| biricodar         | 8  | LEU | 332 | 6 |
| biricodar         | 11 | LEU | 332 | 6 |
| biricodar         | 13 | LEU | 332 | 6 |
| cisZ-flupenthixol | 1  | LEU | 332 | 6 |
| cisZ-flupenthixol | 2  | LEU | 332 | 6 |
| cisZ-flupenthixol | 4  | LEU | 332 | 6 |
| cisZ-flupenthixol | 5  | LEU | 332 | 6 |
| cisZ-flupenthixol | 10 | LEU | 332 | 6 |
| cisZ-flupenthixol | 17 | LEU | 332 | 6 |
| cisZ-flupenthixol | 21 | LEU | 332 | 6 |
| cisZ-flupenthixol | 22 | LEU | 332 | 6 |
| daunorubicin      | 1  | LEU | 332 | 6 |
| daunorubicin      | 3  | LEU | 332 | 6 |
| daunorubicin      | 8  | LEU | 332 | 6 |
| daunorubicin      | 11 | LEU | 332 | 6 |
| daunorubicin      | 12 | LEU | 332 | 6 |
| daunorubicin      | 14 | LEU | 332 | 6 |
| daunorubicin      | 17 | LEU | 332 | 6 |
| daunorubicin      | 22 | LEU | 332 | 6 |
| doxorubicin       | 8  | LEU | 332 | 6 |
| doxorubicin       | 13 | LEU | 332 | 6 |
| doxorubicin       | 15 | LEU | 332 | 6 |
| doxorubicin       | 22 | LEU | 332 | 6 |
| elacridar         | 12 | LEU | 332 | 6 |
| elacridar         | 14 | LEU | 332 | 6 |
| hoechst33342      | 0  | LEU | 332 | 6 |
| hoechst33342      | 5  | LEU | 332 | 6 |
| hoechst33342      | 11 | LEU | 332 | 6 |
| hoechst33342      | 13 | LEU | 332 | 6 |
| hoechst33342      | 14 | LEU | 332 | 6 |
| hoechst33342      | 17 | LEU | 332 | 6 |
| hoechst33342      | 18 | LEU | 332 | 6 |
| lopinavir         | 12 | LEU | 332 | 6 |
| lopinavir         | 13 | LEU | 332 | 6 |
| QZ59S_RRR         | 16 | LEU | 332 | 6 |
| QZ59S_RRR         | 17 | LEU | 332 | 6 |
| QZ59S_RRR         | 20 | LEU | 332 | 6 |
| QZ59S_SSS         | 8  | LEU | 332 | 6 |
| rhodamine123      | 4  | LEU | 332 | 6 |

|                   |    |     |     |   |
|-------------------|----|-----|-----|---|
| rhodamine123      | 7  | LEU | 332 | 6 |
| rhodamine123      | 13 | LEU | 332 | 6 |
| rhodamine123      | 14 | LEU | 332 | 6 |
| rhodamine123      | 15 | LEU | 332 | 6 |
| saquinavir        | 13 | LEU | 332 | 6 |
| tamoxifen         | 1  | LEU | 332 | 6 |
| tamoxifen         | 3  | LEU | 332 | 6 |
| tamoxifen         | 5  | LEU | 332 | 6 |
| tamoxifen         | 10 | LEU | 332 | 6 |
| tamoxifen         | 13 | LEU | 332 | 6 |
| tamoxifen         | 15 | LEU | 332 | 6 |
| tariquidar        | 0  | LEU | 332 | 6 |
| tariquidar        | 9  | LEU | 332 | 6 |
| tariquidar        | 10 | LEU | 332 | 6 |
| verapamil         | 3  | LEU | 332 | 6 |
| verapamil         | 4  | LEU | 332 | 6 |
| verapamil         | 5  | LEU | 332 | 6 |
| verapamil         | 6  | LEU | 332 | 6 |
| verapamil         | 7  | LEU | 332 | 6 |
| verapamil         | 14 | LEU | 332 | 6 |
| verapamil         | 21 | LEU | 332 | 6 |
| verapamil         | 22 | LEU | 332 | 6 |
| zosuquidar        | 9  | LEU | 332 | 6 |
| zosuquidar        | 10 | LEU | 332 | 6 |
| zosuquidar        | 12 | LEU | 332 | 6 |
| zosuquidar        | 16 | LEU | 332 | 6 |
| zosuquidar        | 21 | LEU | 332 | 6 |
| zosuquidar        | 22 | LEU | 332 | 6 |
|                   |    |     |     |   |
| 335               |    |     |     |   |
| biricodar         | 8  | PHE | 335 | 6 |
|                   |    |     |     |   |
| 336               |    |     |     |   |
| biricodar         | 0  | PHE | 336 | 6 |
| biricodar         | 5  | PHE | 336 | 6 |
| biricodar         | 6  | PHE | 336 | 6 |
| biricodar         | 8  | PHE | 336 | 6 |
| biricodar         | 10 | PHE | 336 | 6 |
| biricodar         | 11 | PHE | 336 | 6 |
| biricodar         | 13 | PHE | 336 | 6 |
| cisZ-flupenthixol | 0  | PHE | 336 | 6 |
| cisZ-flupenthixol | 2  | PHE | 336 | 6 |
| cisZ-flupenthixol | 4  | PHE | 336 | 6 |
| cisZ-flupenthixol | 5  | PHE | 336 | 6 |
| cisZ-flupenthixol | 6  | PHE | 336 | 6 |
| cisZ-flupenthixol | 7  | PHE | 336 | 6 |

|                   |    |     |     |   |
|-------------------|----|-----|-----|---|
| cisZ-flupenthixol | 10 | PHE | 336 | 6 |
| cisZ-flupenthixol | 17 | PHE | 336 | 6 |
| cisZ-flupenthixol | 20 | PHE | 336 | 6 |
| cisZ-flupenthixol | 21 | PHE | 336 | 6 |
| cisZ-flupenthixol | 22 | PHE | 336 | 6 |
| cyclosporinA      | 7  | PHE | 336 | 6 |
| cyclosporinA      | 10 | PHE | 336 | 6 |
| daunorubicin      | 1  | PHE | 336 | 6 |
| daunorubicin      | 2  | PHE | 336 | 6 |
| daunorubicin      | 3  | PHE | 336 | 6 |
| daunorubicin      | 5  | PHE | 336 | 6 |
| daunorubicin      | 6  | PHE | 336 | 6 |
| daunorubicin      | 7  | PHE | 336 | 6 |
| daunorubicin      | 12 | PHE | 336 | 6 |
| daunorubicin      | 17 | PHE | 336 | 6 |
| daunorubicin      | 20 | PHE | 336 | 6 |
| daunorubicin      | 22 | PHE | 336 | 6 |
| doxorubicin       | 1  | PHE | 336 | 6 |
| doxorubicin       | 2  | PHE | 336 | 6 |
| doxorubicin       | 5  | PHE | 336 | 6 |
| doxorubicin       | 8  | PHE | 336 | 6 |
| doxorubicin       | 10 | PHE | 336 | 6 |
| doxorubicin       | 12 | PHE | 336 | 6 |
| doxorubicin       | 13 | PHE | 336 | 6 |
| doxorubicin       | 15 | PHE | 336 | 6 |
| doxorubicin       | 16 | PHE | 336 | 6 |
| doxorubicin       | 22 | PHE | 336 | 6 |
| elacridar         | 1  | PHE | 336 | 6 |
| elacridar         | 2  | PHE | 336 | 6 |
| elacridar         | 3  | PHE | 336 | 6 |
| elacridar         | 4  | PHE | 336 | 6 |
| elacridar         | 5  | PHE | 336 | 6 |
| elacridar         | 9  | PHE | 336 | 6 |
| elacridar         | 12 | PHE | 336 | 6 |
| elacridar         | 14 | PHE | 336 | 6 |
| elacridar         | 20 | PHE | 336 | 6 |
| elacridar         | 21 | PHE | 336 | 6 |
| hoechst33342      | 0  | PHE | 336 | 6 |
| hoechst33342      | 2  | PHE | 336 | 6 |
| hoechst33342      | 4  | PHE | 336 | 6 |
| hoechst33342      | 5  | PHE | 336 | 6 |
| hoechst33342      | 6  | PHE | 336 | 6 |
| hoechst33342      | 7  | PHE | 336 | 6 |
| hoechst33342      | 11 | PHE | 336 | 6 |
| hoechst33342      | 13 | PHE | 336 | 6 |
| hoechst33342      | 14 | PHE | 336 | 6 |
| hoechst33342      | 17 | PHE | 336 | 6 |



|              |    |     |     |   |
|--------------|----|-----|-----|---|
| hoechst33342 | 18 | PHE | 336 | 6 |
| hoechst33342 | 22 | PHE | 336 | 6 |
| ivermectin   | 0  | PHE | 336 | 6 |
| ivermectin   | 1  | PHE | 336 | 6 |
| ivermectin   | 2  | PHE | 336 | 6 |
| ivermectin   | 3  | PHE | 336 | 6 |
| ivermectin   | 5  | PHE | 336 | 6 |
| ivermectin   | 6  | PHE | 336 | 6 |
| ivermectin   | 7  | PHE | 336 | 6 |
| ivermectin   | 8  | PHE | 336 | 6 |
| ivermectin   | 13 | PHE | 336 | 6 |
| ivermectin   | 14 | PHE | 336 | 6 |
| lopinavir    | 10 | PHE | 336 | 6 |
| lopinavir    | 12 | PHE | 336 | 6 |
| lopinavir    | 13 | PHE | 336 | 6 |
| lopinavir    | 14 | PHE | 336 | 6 |
| paclitaxel   | 8  | PHE | 336 | 6 |
| QZ59S_RRR    | 0  | PHE | 336 | 6 |
| QZ59S_RRR    | 1  | PHE | 336 | 6 |
| QZ59S_RRR    | 2  | PHE | 336 | 6 |
| QZ59S_RRR    | 5  | PHE | 336 | 6 |
| QZ59S_RRR    | 6  | PHE | 336 | 6 |
| QZ59S_RRR    | 9  | PHE | 336 | 6 |
| QZ59S_RRR    | 10 | PHE | 336 | 6 |
| QZ59S_RRR    | 11 | PHE | 336 | 6 |
| QZ59S_RRR    | 12 | PHE | 336 | 6 |
| QZ59S_RRR    | 13 | PHE | 336 | 6 |
| QZ59S_RRR    | 14 | PHE | 336 | 6 |
| QZ59S_RRR    | 16 | PHE | 336 | 6 |
| QZ59S_RRR    | 20 | PHE | 336 | 6 |
| QZ59S_SSS    | 2  | PHE | 336 | 6 |
| QZ59S_SSS    | 5  | PHE | 336 | 6 |
| QZ59S_SSS    | 6  | PHE | 336 | 6 |
| QZ59S_SSS    | 11 | PHE | 336 | 6 |
| QZ59S_SSS    | 12 | PHE | 336 | 6 |
| rhodamine123 | 1  | PHE | 336 | 6 |
| rhodamine123 | 2  | PHE | 336 | 6 |
| rhodamine123 | 3  | PHE | 336 | 6 |
| rhodamine123 | 4  | PHE | 336 | 6 |
| rhodamine123 | 5  | PHE | 336 | 6 |
| rhodamine123 | 7  | PHE | 336 | 6 |
| rhodamine123 | 13 | PHE | 336 | 6 |
| rhodamine123 | 14 | PHE | 336 | 6 |
| rhodamine123 | 15 | PHE | 336 | 6 |
| rhodamine123 | 16 | PHE | 336 | 6 |
| rhodamine123 | 21 | PHE | 336 | 6 |
| rhodamine123 | 22 | PHE | 336 | 6 |
| ritonavir    | 5  | PHE | 336 | 6 |
| ritonavir    | 6  | PHE | 336 | 6 |
| ritonavir    | 8  | PHE | 336 | 6 |
| ritonavir    | 12 | PHE | 336 | 6 |
| saquinavir   | 2  | PHE | 336 | 6 |

|             |    |     |     |   |
|-------------|----|-----|-----|---|
| saquinavir  | 3  | PHE | 336 | 6 |
| saquinavir  | 8  | PHE | 336 | 6 |
| saquinavir  | 10 | PHE | 336 | 6 |
| saquinavir  | 13 | PHE | 336 | 6 |
| tamoxifen   | 1  | PHE | 336 | 6 |
| tamoxifen   | 2  | PHE | 336 | 6 |
| tamoxifen   | 3  | PHE | 336 | 6 |
| tamoxifen   | 7  | PHE | 336 | 6 |
| tamoxifen   | 10 | PHE | 336 | 6 |
| tamoxifen   | 13 | PHE | 336 | 6 |
| tamoxifen   | 15 | PHE | 336 | 6 |
| tamoxifen   | 21 | PHE | 336 | 6 |
| tamoxifen   | 22 | PHE | 336 | 6 |
| tariquidar  | 0  | PHE | 336 | 6 |
| tariquidar  | 4  | PHE | 336 | 6 |
| tariquidar  | 7  | PHE | 336 | 6 |
| tariquidar  | 8  | PHE | 336 | 6 |
| tariquidar  | 10 | PHE | 336 | 6 |
| tariquidar  | 13 | PHE | 336 | 6 |
| tariquidar  | 16 | PHE | 336 | 6 |
| tariquidar  | 21 | PHE | 336 | 6 |
| valspodar   | 7  | PHE | 336 | 6 |
| valspodar   | 9  | PHE | 336 | 6 |
| verapamil   | 2  | PHE | 336 | 6 |
| verapamil   | 3  | PHE | 336 | 6 |
| verapamil   | 4  | PHE | 336 | 6 |
| verapamil   | 5  | PHE | 336 | 6 |
| verapamil   | 6  | PHE | 336 | 6 |
| verapamil   | 7  | PHE | 336 | 6 |
| verapamil   | 8  | PHE | 336 | 6 |
| verapamil   | 9  | PHE | 336 | 6 |
| verapamil   | 10 | PHE | 336 | 6 |
| verapamil   | 14 | PHE | 336 | 6 |
| verapamil   | 16 | PHE | 336 | 6 |
| verapamil   | 18 | PHE | 336 | 6 |
| verapamil   | 21 | PHE | 336 | 6 |
| verapamil   | 22 | PHE | 336 | 6 |
| vinblastine | 6  | PHE | 336 | 6 |
| vinblastine | 7  | PHE | 336 | 6 |
| vinblastine | 9  | PHE | 336 | 6 |
| vinblastine | 10 | PHE | 336 | 6 |
| vinblastine | 12 | PHE | 336 | 6 |
| vinblastine | 24 | PHE | 336 | 6 |
| zosuquidar  | 1  | PHE | 336 | 6 |
| zosuquidar  | 3  | PHE | 336 | 6 |
| zosuquidar  | 4  | PHE | 336 | 6 |
| zosuquidar  | 9  | PHE | 336 | 6 |
| zosuquidar  | 10 | PHE | 336 | 6 |
| zosuquidar  | 16 | PHE | 336 | 6 |
| zosuquidar  | 19 | PHE | 336 | 6 |
| zosuquidar  | 20 | PHE | 336 | 6 |
| zosuquidar  | 21 | PHE | 336 | 6 |

|                   |    |     |     |   |
|-------------------|----|-----|-----|---|
| zosuquidar        | 22 | PHE | 336 | 6 |
|                   |    |     |     |   |
| 338               |    |     |     |   |
| tamoxifen         | 0  | VAL | 338 | 6 |
| tamoxifen         | 24 | VAL | 338 | 6 |
|                   |    |     |     |   |
| 339               |    |     |     |   |
| biricodar         | 5  | LEU | 339 | 6 |
| biricodar         | 6  | LEU | 339 | 6 |
| biricodar         | 7  | LEU | 339 | 6 |
| biricodar         | 8  | LEU | 339 | 6 |
| biricodar         | 9  | LEU | 339 | 6 |
| biricodar         | 11 | LEU | 339 | 6 |
| biricodar         | 12 | LEU | 339 | 6 |
| biricodar         | 18 | LEU | 339 | 6 |
| cisZ-flupenthixol | 2  | LEU | 339 | 6 |
| cisZ-flupenthixol | 6  | LEU | 339 | 6 |
| cisZ-flupenthixol | 7  | LEU | 339 | 6 |
| cisZ-flupenthixol | 8  | LEU | 339 | 6 |
| cisZ-flupenthixol | 9  | LEU | 339 | 6 |
| cisZ-flupenthixol | 13 | LEU | 339 | 6 |
| cisZ-flupenthixol | 14 | LEU | 339 | 6 |
| cisZ-flupenthixol | 15 | LEU | 339 | 6 |
| cisZ-flupenthixol | 16 | LEU | 339 | 6 |
| cyclosporinA      | 7  | LEU | 339 | 6 |
| cyclosporinA      | 10 | LEU | 339 | 6 |
| daunorubicin      | 5  | LEU | 339 | 6 |
| daunorubicin      | 6  | LEU | 339 | 6 |
| daunorubicin      | 9  | LEU | 339 | 6 |
| daunorubicin      | 12 | LEU | 339 | 6 |
| daunorubicin      | 13 | LEU | 339 | 6 |
| daunorubicin      | 20 | LEU | 339 | 6 |
| doxorubicin       | 5  | LEU | 339 | 6 |
| doxorubicin       | 12 | LEU | 339 | 6 |
| elacridar         | 1  | LEU | 339 | 6 |
| elacridar         | 2  | LEU | 339 | 6 |
| elacridar         | 5  | LEU | 339 | 6 |
| elacridar         | 8  | LEU | 339 | 6 |
| elacridar         | 9  | LEU | 339 | 6 |
| elacridar         | 12 | LEU | 339 | 6 |
| elacridar         | 16 | LEU | 339 | 6 |
| elacridar         | 20 | LEU | 339 | 6 |
| hoechst33342      | 6  | LEU | 339 | 6 |

|              |    |     |     |   |
|--------------|----|-----|-----|---|
| hoechst33342 | 7  | LEU | 339 | 6 |
| hoechst33342 | 15 | LEU | 339 | 6 |
| hoechst33342 | 16 | LEU | 339 | 6 |
| ivermectin   | 0  | LEU | 339 | 6 |
| ivermectin   | 2  | LEU | 339 | 6 |
| ivermectin   | 4  | LEU | 339 | 6 |
| ivermectin   | 7  | LEU | 339 | 6 |
| ivermectin   | 8  | LEU | 339 | 6 |
| ivermectin   | 11 | LEU | 339 | 6 |
| ivermectin   | 12 | LEU | 339 | 6 |
| ivermectin   | 13 | LEU | 339 | 6 |
| ivermectin   | 14 | LEU | 339 | 6 |
| ivermectin   | 15 | LEU | 339 | 6 |
| ivermectin   | 16 | LEU | 339 | 6 |
| ivermectin   | 20 | LEU | 339 | 6 |
| ivermectin   | 21 | LEU | 339 | 6 |
| lopinavir    | 1  | LEU | 339 | 6 |
| lopinavir    | 10 | LEU | 339 | 6 |
| lopinavir    | 12 | LEU | 339 | 6 |
| lopinavir    | 14 | LEU | 339 | 6 |
| lopinavir    | 16 | LEU | 339 | 6 |
| paclitaxel   | 8  | LEU | 339 | 6 |
| QZ59S_RRR    | 1  | LEU | 339 | 6 |
| QZ59S_RRR    | 2  | LEU | 339 | 6 |
| QZ59S_RRR    | 5  | LEU | 339 | 6 |
| QZ59S_RRR    | 6  | LEU | 339 | 6 |
| QZ59S_RRR    | 7  | LEU | 339 | 6 |
| QZ59S_RRR    | 11 | LEU | 339 | 6 |
| QZ59S_RRR    | 12 | LEU | 339 | 6 |
| QZ59S_RRR    | 13 | LEU | 339 | 6 |
| QZ59S_RRR    | 15 | LEU | 339 | 6 |
| QZ59S_RRR    | 21 | LEU | 339 | 6 |
| QZ59S_SSS    | 0  | LEU | 339 | 6 |
| QZ59S_SSS    | 5  | LEU | 339 | 6 |
| QZ59S_SSS    | 6  | LEU | 339 | 6 |
| QZ59S_SSS    | 11 | LEU | 339 | 6 |
| QZ59S_SSS    | 12 | LEU | 339 | 6 |
| QZ59S_SSS    | 14 | LEU | 339 | 6 |
| QZ59S_SSS    | 16 | LEU | 339 | 6 |
| rhodamine123 | 1  | LEU | 339 | 6 |
| rhodamine123 | 2  | LEU | 339 | 6 |
| rhodamine123 | 11 | LEU | 339 | 6 |
| rhodamine123 | 12 | LEU | 339 | 6 |
| rhodamine123 | 13 | LEU | 339 | 6 |
| rhodamine123 | 14 | LEU | 339 | 6 |
| rhodamine123 | 15 | LEU | 339 | 6 |
| rhodamine123 | 16 | LEU | 339 | 6 |
| rhodamine123 | 18 | LEU | 339 | 6 |
| rhodamine123 | 22 | LEU | 339 | 6 |
| ritonavir    | 5  | LEU | 339 | 6 |
| ritonavir    | 6  | LEU | 339 | 6 |
| ritonavir    | 8  | LEU | 339 | 6 |

|             |    |     |     |   |
|-------------|----|-----|-----|---|
| ritonavir   | 9  | LEU | 339 | 6 |
| ritonavir   | 12 | LEU | 339 | 6 |
| ritonavir   | 14 | LEU | 339 | 6 |
| ritonavir   | 16 | LEU | 339 | 6 |
| saquinavir  | 3  | LEU | 339 | 6 |
| saquinavir  | 8  | LEU | 339 | 6 |
| saquinavir  | 10 | LEU | 339 | 6 |
| saquinavir  | 16 | LEU | 339 | 6 |
| tamoxifen   | 7  | LEU | 339 | 6 |
| tamoxifen   | 8  | LEU | 339 | 6 |
| tamoxifen   | 11 | LEU | 339 | 6 |
| tamoxifen   | 12 | LEU | 339 | 6 |
| tamoxifen   | 16 | LEU | 339 | 6 |
| tamoxifen   | 22 | LEU | 339 | 6 |
| tariquidar  | 0  | LEU | 339 | 6 |
| tariquidar  | 1  | LEU | 339 | 6 |
| tariquidar  | 4  | LEU | 339 | 6 |
| tariquidar  | 8  | LEU | 339 | 6 |
| tariquidar  | 13 | LEU | 339 | 6 |
| tariquidar  | 16 | LEU | 339 | 6 |
| tariquidar  | 21 | LEU | 339 | 6 |
| valspodar   | 7  | LEU | 339 | 6 |
| valspodar   | 8  | LEU | 339 | 6 |
| valspodar   | 9  | LEU | 339 | 6 |
| valspodar   | 10 | LEU | 339 | 6 |
| verapamil   | 0  | LEU | 339 | 6 |
| verapamil   | 4  | LEU | 339 | 6 |
| verapamil   | 5  | LEU | 339 | 6 |
| verapamil   | 6  | LEU | 339 | 6 |
| verapamil   | 7  | LEU | 339 | 6 |
| verapamil   | 8  | LEU | 339 | 6 |
| verapamil   | 12 | LEU | 339 | 6 |
| verapamil   | 14 | LEU | 339 | 6 |
| verapamil   | 16 | LEU | 339 | 6 |
| vinblastine | 6  | LEU | 339 | 6 |
| vinblastine | 7  | LEU | 339 | 6 |
| vinblastine | 9  | LEU | 339 | 6 |
| vinblastine | 10 | LEU | 339 | 6 |
| vinblastine | 12 | LEU | 339 | 6 |
| zosuquidar  | 1  | LEU | 339 | 6 |
| zosuquidar  | 4  | LEU | 339 | 6 |
| zosuquidar  | 11 | LEU | 339 | 6 |
| zosuquidar  | 12 | LEU | 339 | 6 |
| zosuquidar  | 20 | LEU | 339 | 6 |
|             |    |     |     |   |
| 340         |    |     |     |   |
| biricodar   | 0  | ILE | 340 | 6 |
| biricodar   | 2  | ILE | 340 | 6 |
| biricodar   | 5  | ILE | 340 | 6 |
| biricodar   | 6  | ILE | 340 | 6 |
| biricodar   | 7  | ILE | 340 | 6 |
| biricodar   | 11 | ILE | 340 | 6 |

|                   |    |     |     |   |
|-------------------|----|-----|-----|---|
| biricodar         | 20 | ILE | 340 | 6 |
| biricodar         | 23 | ILE | 340 | 6 |
| cisZ-flupenthixol | 21 | ILE | 340 | 6 |
| cyclosporinA      | 4  | ILE | 340 | 6 |
| cyclosporinA      | 7  | ILE | 340 | 6 |
| cyclosporinA      | 10 | ILE | 340 | 6 |
| cyclosporinA      | 12 | ILE | 340 | 6 |
| cyclosporinA      | 13 | ILE | 340 | 6 |
| cyclosporinA      | 15 | ILE | 340 | 6 |
| cyclosporinA      | 17 | ILE | 340 | 6 |
| daunorubicin      | 1  | ILE | 340 | 6 |
| daunorubicin      | 2  | ILE | 340 | 6 |
| daunorubicin      | 3  | ILE | 340 | 6 |
| daunorubicin      | 18 | ILE | 340 | 6 |
| daunorubicin      | 20 | ILE | 340 | 6 |
| doxorubicin       | 1  | ILE | 340 | 6 |
| doxorubicin       | 2  | ILE | 340 | 6 |
| doxorubicin       | 3  | ILE | 340 | 6 |
| doxorubicin       | 18 | ILE | 340 | 6 |
| elacridar         | 1  | ILE | 340 | 6 |
| elacridar         | 2  | ILE | 340 | 6 |
| elacridar         | 4  | ILE | 340 | 6 |
| elacridar         | 6  | ILE | 340 | 6 |
| elacridar         | 15 | ILE | 340 | 6 |
| elacridar         | 17 | ILE | 340 | 6 |
| elacridar         | 18 | ILE | 340 | 6 |
| elacridar         | 20 | ILE | 340 | 6 |
| elacridar         | 21 | ILE | 340 | 6 |
| elacridar         | 25 | ILE | 340 | 6 |
| hoechst33342      | 6  | ILE | 340 | 6 |
| hoechst33342      | 17 | ILE | 340 | 6 |
| hoechst33342      | 18 | ILE | 340 | 6 |
| hoechst33342      | 22 | ILE | 340 | 6 |
| ivermectin        | 0  | ILE | 340 | 6 |
| ivermectin        | 1  | ILE | 340 | 6 |
| ivermectin        | 2  | ILE | 340 | 6 |
| ivermectin        | 3  | ILE | 340 | 6 |
| ivermectin        | 7  | ILE | 340 | 6 |
| ivermectin        | 8  | ILE | 340 | 6 |
| ivermectin        | 14 | ILE | 340 | 6 |
| ivermectin        | 15 | ILE | 340 | 6 |
| ivermectin        | 17 | ILE | 340 | 6 |
| ivermectin        | 18 | ILE | 340 | 6 |
| ivermectin        | 19 | ILE | 340 | 6 |
| ivermectin        | 20 | ILE | 340 | 6 |
| ivermectin        | 21 | ILE | 340 | 6 |
| lopinavir         | 3  | ILE | 340 | 6 |
| lopinavir         | 10 | ILE | 340 | 6 |
| lopinavir         | 11 | ILE | 340 | 6 |
| lopinavir         | 15 | ILE | 340 | 6 |
| lopinavir         | 22 | ILE | 340 | 6 |

|              |    |     |     |   |
|--------------|----|-----|-----|---|
| paclitaxel   | 10 | ILE | 340 | 6 |
| QZ59S_RRR    | 0  | ILE | 340 | 6 |
| QZ59S_RRR    | 2  | ILE | 340 | 6 |
| QZ59S_RRR    | 14 | ILE | 340 | 6 |
| QZ59S_RRR    | 19 | ILE | 340 | 6 |
| QZ59S_RRR    | 21 | ILE | 340 | 6 |
| QZ59S_SSS    | 0  | ILE | 340 | 6 |
| QZ59S_SSS    | 2  | ILE | 340 | 6 |
| QZ59S_SSS    | 7  | ILE | 340 | 6 |
| QZ59S_SSS    | 22 | ILE | 340 | 6 |
| QZ59S_SSS    | 23 | ILE | 340 | 6 |
| rhodamine123 | 22 | ILE | 340 | 6 |
| ritonavir    | 3  | ILE | 340 | 6 |
| ritonavir    | 5  | ILE | 340 | 6 |
| ritonavir    | 7  | ILE | 340 | 6 |
| ritonavir    | 8  | ILE | 340 | 6 |
| ritonavir    | 19 | ILE | 340 | 6 |
| ritonavir    | 22 | ILE | 340 | 6 |
| saquinavir   | 0  | ILE | 340 | 6 |
| saquinavir   | 2  | ILE | 340 | 6 |
| saquinavir   | 3  | ILE | 340 | 6 |
| saquinavir   | 4  | ILE | 340 | 6 |
| saquinavir   | 6  | ILE | 340 | 6 |
| saquinavir   | 7  | ILE | 340 | 6 |
| saquinavir   | 9  | ILE | 340 | 6 |
| saquinavir   | 10 | ILE | 340 | 6 |
| saquinavir   | 19 | ILE | 340 | 6 |
| saquinavir   | 20 | ILE | 340 | 6 |
| saquinavir   | 23 | ILE | 340 | 6 |
| tamoxifen    | 1  | ILE | 340 | 6 |
| tamoxifen    | 2  | ILE | 340 | 6 |
| tamoxifen    | 7  | ILE | 340 | 6 |
| tamoxifen    | 21 | ILE | 340 | 6 |
| tamoxifen    | 22 | ILE | 340 | 6 |
| tariquidar   | 0  | ILE | 340 | 6 |
| tariquidar   | 2  | ILE | 340 | 6 |
| tariquidar   | 13 | ILE | 340 | 6 |
| tariquidar   | 16 | ILE | 340 | 6 |
| tariquidar   | 21 | ILE | 340 | 6 |
| valspodar    | 7  | ILE | 340 | 6 |
| valspodar    | 8  | ILE | 340 | 6 |
| valspodar    | 9  | ILE | 340 | 6 |
| valspodar    | 10 | ILE | 340 | 6 |
| valspodar    | 14 | ILE | 340 | 6 |
| verapamil    | 2  | ILE | 340 | 6 |
| verapamil    | 3  | ILE | 340 | 6 |
| verapamil    | 6  | ILE | 340 | 6 |
| verapamil    | 15 | ILE | 340 | 6 |
| verapamil    | 16 | ILE | 340 | 6 |
| verapamil    | 18 | ILE | 340 | 6 |
| vinblastine  | 1  | ILE | 340 | 6 |
| vinblastine  | 2  | ILE | 340 | 6 |

|                   |    |     |     |   |
|-------------------|----|-----|-----|---|
| vinblastine       | 6  | ILE | 340 | 6 |
| vinblastine       | 7  | ILE | 340 | 6 |
| vinblastine       | 8  | ILE | 340 | 6 |
| vinblastine       | 9  | ILE | 340 | 6 |
| vinblastine       | 10 | ILE | 340 | 6 |
| vinblastine       | 13 | ILE | 340 | 6 |
| vinblastine       | 14 | ILE | 340 | 6 |
| vinblastine       | 16 | ILE | 340 | 6 |
| zosuquidar        | 1  | ILE | 340 | 6 |
| zosuquidar        | 3  | ILE | 340 | 6 |
| zosuquidar        | 4  | ILE | 340 | 6 |
| zosuquidar        | 14 | ILE | 340 | 6 |
| zosuquidar        | 18 | ILE | 340 | 6 |
| zosuquidar        | 19 | ILE | 340 | 6 |
| zosuquidar        | 20 | ILE | 340 | 6 |
|                   |    |     |     |   |
| 342               |    |     |     |   |
| biricodar         | 1  | ALA | 342 | 6 |
| biricodar         | 9  | ALA | 342 | 6 |
| cisZ-flupenthixol | 8  | ALA | 342 | 6 |
| cisZ-flupenthixol | 9  | ALA | 342 | 6 |
| cisZ-flupenthixol | 13 | ALA | 342 | 6 |
| cisZ-flupenthixol | 14 | ALA | 342 | 6 |
| cisZ-flupenthixol | 15 | ALA | 342 | 6 |
| cisZ-flupenthixol | 16 | ALA | 342 | 6 |
| cyclosporinA      | 1  | ALA | 342 | 6 |
| daunorubicin      | 9  | ALA | 342 | 6 |
| daunorubicin      | 13 | ALA | 342 | 6 |
| elacridar         | 0  | ALA | 342 | 6 |
| elacridar         | 8  | ALA | 342 | 6 |
| elacridar         | 13 | ALA | 342 | 6 |
| elacridar         | 15 | ALA | 342 | 6 |
| elacridar         | 16 | ALA | 342 | 6 |
| hoechst33342      | 15 | ALA | 342 | 6 |
| hoechst33342      | 16 | ALA | 342 | 6 |
| ivermectin        | 9  | ALA | 342 | 6 |
| ivermectin        | 11 | ALA | 342 | 6 |
| ivermectin        | 12 | ALA | 342 | 6 |
| ivermectin        | 16 | ALA | 342 | 6 |
| lopinavir         | 2  | ALA | 342 | 6 |
| lopinavir         | 8  | ALA | 342 | 6 |
| paclitaxel        | 18 | ALA | 342 | 6 |
| QZ59S_RRR         | 7  | ALA | 342 | 6 |
| QZ59S_RRR         | 15 | ALA | 342 | 6 |
| QZ59S_SSS         | 1  | ALA | 342 | 6 |
| QZ59S_SSS         | 15 | ALA | 342 | 6 |



|                   |    |     |     |   |
|-------------------|----|-----|-----|---|
| rhodamine123      | 9  | ALA | 342 | 6 |
| rhodamine123      | 11 | ALA | 342 | 6 |
| rhodamine123      | 12 | ALA | 342 | 6 |
| ritonavir         | 1  | ALA | 342 | 6 |
| ritonavir         | 14 | ALA | 342 | 6 |
| ritonavir         | 16 | ALA | 342 | 6 |
| saquinavir        | 16 | ALA | 342 | 6 |
| tamoxifen         | 0  | ALA | 342 | 6 |
| tamoxifen         | 11 | ALA | 342 | 6 |
| tamoxifen         | 12 | ALA | 342 | 6 |
| tamoxifen         | 16 | ALA | 342 | 6 |
| tamoxifen         | 20 | ALA | 342 | 6 |
| tariquidar        | 8  | ALA | 342 | 6 |
| tariquidar        | 16 | ALA | 342 | 6 |
| verapamil         | 1  | ALA | 342 | 6 |
| verapamil         | 8  | ALA | 342 | 6 |
| verapamil         | 12 | ALA | 342 | 6 |
| vinblastine       | 5  | ALA | 342 | 6 |
| zosuquidar        | 0  | ALA | 342 | 6 |
| zosuquidar        | 13 | ALA | 342 | 6 |
|                   |    |     |     |   |
| 343               |    |     |     |   |
| biricodar         | 0  | PHE | 343 | 6 |
| biricodar         | 3  | PHE | 343 | 6 |
| biricodar         | 4  | PHE | 343 | 6 |
| biricodar         | 5  | PHE | 343 | 6 |
| biricodar         | 6  | PHE | 343 | 6 |
| biricodar         | 7  | PHE | 343 | 6 |
| biricodar         | 9  | PHE | 343 | 6 |
| biricodar         | 11 | PHE | 343 | 6 |
| biricodar         | 16 | PHE | 343 | 6 |
| biricodar         | 18 | PHE | 343 | 6 |
| biricodar         | 23 | PHE | 343 | 6 |
| cisZ-flupenthixol | 2  | PHE | 343 | 6 |
| cisZ-flupenthixol | 8  | PHE | 343 | 6 |
| cisZ-flupenthixol | 9  | PHE | 343 | 6 |
| cisZ-flupenthixol | 13 | PHE | 343 | 6 |
| cisZ-flupenthixol | 14 | PHE | 343 | 6 |
| cisZ-flupenthixol | 15 | PHE | 343 | 6 |
| cisZ-flupenthixol | 16 | PHE | 343 | 6 |
| cyclosporinA      | 0  | PHE | 343 | 6 |
| cyclosporinA      | 1  | PHE | 343 | 6 |
| cyclosporinA      | 2  | PHE | 343 | 6 |
| cyclosporinA      | 3  | PHE | 343 | 6 |
| cyclosporinA      | 4  | PHE | 343 | 6 |

|              |    |     |     |   |
|--------------|----|-----|-----|---|
| cyclosporinA | 5  | PHE | 343 | 6 |
| cyclosporinA | 7  | PHE | 343 | 6 |
| cyclosporinA | 10 | PHE | 343 | 6 |
| cyclosporinA | 12 | PHE | 343 | 6 |
| cyclosporinA | 13 | PHE | 343 | 6 |
| cyclosporinA | 14 | PHE | 343 | 6 |
| cyclosporinA | 15 | PHE | 343 | 6 |
| cyclosporinA | 16 | PHE | 343 | 6 |
| cyclosporinA | 17 | PHE | 343 | 6 |
| cyclosporinA | 19 | PHE | 343 | 6 |
| cyclosporinA | 22 | PHE | 343 | 6 |
| cyclosporinA | 23 | PHE | 343 | 6 |
| cyclosporinA | 24 | PHE | 343 | 6 |
| daunorubicin | 6  | PHE | 343 | 6 |
| daunorubicin | 9  | PHE | 343 | 6 |
| daunorubicin | 13 | PHE | 343 | 6 |
| daunorubicin | 20 | PHE | 343 | 6 |
| daunorubicin | 25 | PHE | 343 | 6 |
| elacridar    | 0  | PHE | 343 | 6 |
| elacridar    | 1  | PHE | 343 | 6 |
| elacridar    | 2  | PHE | 343 | 6 |
| elacridar    | 4  | PHE | 343 | 6 |
| elacridar    | 5  | PHE | 343 | 6 |
| elacridar    | 6  | PHE | 343 | 6 |
| elacridar    | 8  | PHE | 343 | 6 |
| elacridar    | 13 | PHE | 343 | 6 |
| elacridar    | 15 | PHE | 343 | 6 |
| elacridar    | 16 | PHE | 343 | 6 |
| elacridar    | 17 | PHE | 343 | 6 |
| elacridar    | 18 | PHE | 343 | 6 |
| elacridar    | 20 | PHE | 343 | 6 |
| elacridar    | 21 | PHE | 343 | 6 |
| hoechst33342 | 4  | PHE | 343 | 6 |
| hoechst33342 | 6  | PHE | 343 | 6 |
| hoechst33342 | 15 | PHE | 343 | 6 |
| hoechst33342 | 16 | PHE | 343 | 6 |
| hoechst33342 | 22 | PHE | 343 | 6 |
| ivermectin   | 0  | PHE | 343 | 6 |
| ivermectin   | 2  | PHE | 343 | 6 |
| ivermectin   | 3  | PHE | 343 | 6 |
| ivermectin   | 4  | PHE | 343 | 6 |
| ivermectin   | 5  | PHE | 343 | 6 |
| ivermectin   | 6  | PHE | 343 | 6 |
| ivermectin   | 7  | PHE | 343 | 6 |
| ivermectin   | 9  | PHE | 343 | 6 |
| ivermectin   | 10 | PHE | 343 | 6 |
| ivermectin   | 11 | PHE | 343 | 6 |
| ivermectin   | 12 | PHE | 343 | 6 |
| ivermectin   | 13 | PHE | 343 | 6 |
| ivermectin   | 14 | PHE | 343 | 6 |
| ivermectin   | 15 | PHE | 343 | 6 |
| ivermectin   | 16 | PHE | 343 | 6 |

|            |    |     |     |   |
|------------|----|-----|-----|---|
| ivermectin | 17 | PHE | 343 | 6 |
| ivermectin | 18 | PHE | 343 | 6 |
| ivermectin | 19 | PHE | 343 | 6 |
| ivermectin | 20 | PHE | 343 | 6 |
| ivermectin | 21 | PHE | 343 | 6 |
| ivermectin | 23 | PHE | 343 | 6 |
| lopinavir  | 1  | PHE | 343 | 6 |
| lopinavir  | 2  | PHE | 343 | 6 |
| lopinavir  | 3  | PHE | 343 | 6 |
| lopinavir  | 4  | PHE | 343 | 6 |
| lopinavir  | 7  | PHE | 343 | 6 |
| lopinavir  | 8  | PHE | 343 | 6 |
| lopinavir  | 10 | PHE | 343 | 6 |
| lopinavir  | 11 | PHE | 343 | 6 |
| lopinavir  | 14 | PHE | 343 | 6 |
| lopinavir  | 15 | PHE | 343 | 6 |
| lopinavir  | 16 | PHE | 343 | 6 |
| lopinavir  | 18 | PHE | 343 | 6 |
| lopinavir  | 22 | PHE | 343 | 6 |
| paclitaxel | 0  | PHE | 343 | 6 |
| paclitaxel | 1  | PHE | 343 | 6 |
| paclitaxel | 2  | PHE | 343 | 6 |
| paclitaxel | 3  | PHE | 343 | 6 |
| paclitaxel | 4  | PHE | 343 | 6 |
| paclitaxel | 5  | PHE | 343 | 6 |
| paclitaxel | 6  | PHE | 343 | 6 |
| paclitaxel | 7  | PHE | 343 | 6 |
| paclitaxel | 10 | PHE | 343 | 6 |
| paclitaxel | 14 | PHE | 343 | 6 |
| paclitaxel | 16 | PHE | 343 | 6 |
| paclitaxel | 18 | PHE | 343 | 6 |
| paclitaxel | 20 | PHE | 343 | 6 |
| paclitaxel | 23 | PHE | 343 | 6 |
| QZ59S_RRR  | 0  | PHE | 343 | 6 |
| QZ59S_RRR  | 1  | PHE | 343 | 6 |
| QZ59S_RRR  | 2  | PHE | 343 | 6 |
| QZ59S_RRR  | 3  | PHE | 343 | 6 |
| QZ59S_RRR  | 5  | PHE | 343 | 6 |
| QZ59S_RRR  | 6  | PHE | 343 | 6 |
| QZ59S_RRR  | 7  | PHE | 343 | 6 |
| QZ59S_RRR  | 11 | PHE | 343 | 6 |
| QZ59S_RRR  | 14 | PHE | 343 | 6 |
| QZ59S_RRR  | 15 | PHE | 343 | 6 |
| QZ59S_RRR  | 19 | PHE | 343 | 6 |
| QZ59S_RRR  | 21 | PHE | 343 | 6 |
| QZ59S_SSS  | 0  | PHE | 343 | 6 |
| QZ59S_SSS  | 1  | PHE | 343 | 6 |
| QZ59S_SSS  | 4  | PHE | 343 | 6 |
| QZ59S_SSS  | 5  | PHE | 343 | 6 |
| QZ59S_SSS  | 12 | PHE | 343 | 6 |
| QZ59S_SSS  | 14 | PHE | 343 | 6 |
| QZ59S_SSS  | 15 | PHE | 343 | 6 |

|              |    |     |     |   |
|--------------|----|-----|-----|---|
| QZ59S_SSS    | 16 | PHE | 343 | 6 |
| QZ59S_SSS    | 17 | PHE | 343 | 6 |
| QZ59S_SSS    | 22 | PHE | 343 | 6 |
| rhodamine123 | 2  | PHE | 343 | 6 |
| rhodamine123 | 9  | PHE | 343 | 6 |
| rhodamine123 | 11 | PHE | 343 | 6 |
| rhodamine123 | 12 | PHE | 343 | 6 |
| rhodamine123 | 17 | PHE | 343 | 6 |
| rhodamine123 | 18 | PHE | 343 | 6 |
| rhodamine123 | 22 | PHE | 343 | 6 |
| ritonavir    | 1  | PHE | 343 | 6 |
| ritonavir    | 3  | PHE | 343 | 6 |
| ritonavir    | 4  | PHE | 343 | 6 |
| ritonavir    | 5  | PHE | 343 | 6 |
| ritonavir    | 6  | PHE | 343 | 6 |
| ritonavir    | 7  | PHE | 343 | 6 |
| ritonavir    | 8  | PHE | 343 | 6 |
| ritonavir    | 9  | PHE | 343 | 6 |
| ritonavir    | 14 | PHE | 343 | 6 |
| ritonavir    | 15 | PHE | 343 | 6 |
| ritonavir    | 16 | PHE | 343 | 6 |
| ritonavir    | 17 | PHE | 343 | 6 |
| ritonavir    | 18 | PHE | 343 | 6 |
| ritonavir    | 19 | PHE | 343 | 6 |
| ritonavir    | 21 | PHE | 343 | 6 |
| ritonavir    | 22 | PHE | 343 | 6 |
| saquinavir   | 0  | PHE | 343 | 6 |
| saquinavir   | 1  | PHE | 343 | 6 |
| saquinavir   | 2  | PHE | 343 | 6 |
| saquinavir   | 3  | PHE | 343 | 6 |
| saquinavir   | 4  | PHE | 343 | 6 |
| saquinavir   | 5  | PHE | 343 | 6 |
| saquinavir   | 6  | PHE | 343 | 6 |
| saquinavir   | 8  | PHE | 343 | 6 |
| saquinavir   | 9  | PHE | 343 | 6 |
| saquinavir   | 16 | PHE | 343 | 6 |
| saquinavir   | 19 | PHE | 343 | 6 |
| saquinavir   | 20 | PHE | 343 | 6 |
| tamoxifen    | 0  | PHE | 343 | 6 |
| tamoxifen    | 2  | PHE | 343 | 6 |
| tamoxifen    | 8  | PHE | 343 | 6 |
| tamoxifen    | 11 | PHE | 343 | 6 |
| tamoxifen    | 12 | PHE | 343 | 6 |
| tamoxifen    | 16 | PHE | 343 | 6 |
| tamoxifen    | 20 | PHE | 343 | 6 |
| tamoxifen    | 21 | PHE | 343 | 6 |
| tamoxifen    | 22 | PHE | 343 | 6 |
| tariquidar   | 0  | PHE | 343 | 6 |
| tariquidar   | 1  | PHE | 343 | 6 |
| tariquidar   | 2  | PHE | 343 | 6 |
| tariquidar   | 3  | PHE | 343 | 6 |
| tariquidar   | 4  | PHE | 343 | 6 |

|                   |    |     |     |     |
|-------------------|----|-----|-----|-----|
| tariquidar        | 6  | PHE | 343 | 6   |
| tariquidar        | 8  | PHE | 343 | 6   |
| tariquidar        | 13 | PHE | 343 | 6   |
| tariquidar        | 16 | PHE | 343 | 6   |
| tariquidar        | 21 | PHE | 343 | 6   |
| tariquidar        | 22 | PHE | 343 | 6   |
| valspodar         | 4  | PHE | 343 | 6   |
| valspodar         | 5  | PHE | 343 | 6   |
| valspodar         | 7  | PHE | 343 | 6   |
| valspodar         | 8  | PHE | 343 | 6   |
| valspodar         | 9  | PHE | 343 | 6   |
| valspodar         | 10 | PHE | 343 | 6   |
| valspodar         | 13 | PHE | 343 | 6   |
| valspodar         | 14 | PHE | 343 | 6   |
| valspodar         | 15 | PHE | 343 | 6   |
| valspodar         | 16 | PHE | 343 | 6   |
| valspodar         | 23 | PHE | 343 | 6   |
| valspodar         | 25 | PHE | 343 | 6   |
| verapamil         | 0  | PHE | 343 | 6   |
| verapamil         | 1  | PHE | 343 | 6   |
| verapamil         | 6  | PHE | 343 | 6   |
| verapamil         | 8  | PHE | 343 | 6   |
| verapamil         | 16 | PHE | 343 | 6   |
| verapamil         | 18 | PHE | 343 | 6   |
| vinblastine       | 1  | PHE | 343 | 6   |
| vinblastine       | 2  | PHE | 343 | 6   |
| vinblastine       | 3  | PHE | 343 | 6   |
| vinblastine       | 4  | PHE | 343 | 6   |
| vinblastine       | 5  | PHE | 343 | 6   |
| vinblastine       | 6  | PHE | 343 | 6   |
| vinblastine       | 11 | PHE | 343 | 6   |
| vinblastine       | 12 | PHE | 343 | 6   |
| vinblastine       | 13 | PHE | 343 | 6   |
| vinblastine       | 14 | PHE | 343 | 6   |
| vinblastine       | 16 | PHE | 343 | 6   |
| vinblastine       | 24 | PHE | 343 | 6   |
| zosuquidar        | 0  | PHE | 343 | 6   |
| zosuquidar        | 1  | PHE | 343 | 6   |
| zosuquidar        | 3  | PHE | 343 | 6   |
| zosuquidar        | 4  | PHE | 343 | 6   |
| zosuquidar        | 13 | PHE | 343 | 6   |
| zosuquidar        | 20 | PHE | 343 | 6   |
| zosuquidar        | 25 | PHE | 343 | 6   |
|                   |    |     |     |     |
| 363               |    |     |     |     |
| pyrophosphate     | 25 | TYR | 363 | CH6 |
|                   |    |     |     |     |
| 721               |    |     |     |     |
| biricodar         | 8  | ASN | 721 | 7   |
| biricodar         | 18 | ASN | 721 | 7   |
| cisZ-flupenthixol | 15 | ASN | 721 | 7   |

|                   |    |     |     |   |
|-------------------|----|-----|-----|---|
| cisZ-flupenthixol | 16 | ASN | 721 | 7 |
| cyclosporinA      | 16 | ASN | 721 | 7 |
| cyclosporinA      | 17 | ASN | 721 | 7 |
| cyclosporinA      | 19 | ASN | 721 | 7 |
| cyclosporinA      | 22 | ASN | 721 | 7 |
| cyclosporinA      | 23 | ASN | 721 | 7 |
| daunorubicin      | 20 | ASN | 721 | 7 |
| doxorubicin       | 12 | ASN | 721 | 7 |
| elacridar         | 4  | ASN | 721 | 7 |
| elacridar         | 5  | ASN | 721 | 7 |
| elacridar         | 16 | ASN | 721 | 7 |
| elacridar         | 22 | ASN | 721 | 7 |
| hoechst33342      | 15 | ASN | 721 | 7 |
| ivermectin        | 15 | ASN | 721 | 7 |
| ivermectin        | 23 | ASN | 721 | 7 |
| lopinavir         | 16 | ASN | 721 | 7 |
| lopinavir         | 17 | ASN | 721 | 7 |
| paclitaxel        | 18 | ASN | 721 | 7 |
| paclitaxel        | 20 | ASN | 721 | 7 |
| paclitaxel        | 22 | ASN | 721 | 7 |
| paclitaxel        | 23 | ASN | 721 | 7 |
| QZ59S_RRR         | 3  | ASN | 721 | 7 |
| QZ59S_RRR         | 15 | ASN | 721 | 7 |
| QZ59S_RRR         | 21 | ASN | 721 | 7 |
| QZ59S_SSS         | 4  | ASN | 721 | 7 |
| QZ59S_SSS         | 14 | ASN | 721 | 7 |
| QZ59S_SSS         | 15 | ASN | 721 | 7 |
| QZ59S_SSS         | 16 | ASN | 721 | 7 |
| QZ59S_SSS         | 17 | ASN | 721 | 7 |
| QZ59S_SSS         | 22 | ASN | 721 | 7 |
| rhodamine123      | 15 | ASN | 721 | 7 |
| rhodamine123      | 16 | ASN | 721 | 7 |
| rhodamine123      | 18 | ASN | 721 | 7 |
| ritonavir         | 0  | ASN | 721 | 7 |
| ritonavir         | 6  | ASN | 721 | 7 |
| ritonavir         | 10 | ASN | 721 | 7 |
| ritonavir         | 12 | ASN | 721 | 7 |
| ritonavir         | 15 | ASN | 721 | 7 |
| ritonavir         | 16 | ASN | 721 | 7 |
| ritonavir         | 18 | ASN | 721 | 7 |
| ritonavir         | 19 | ASN | 721 | 7 |
| ritonavir         | 21 | ASN | 721 | 7 |
| ritonavir         | 22 | ASN | 721 | 7 |
| saquinavir        | 3  | ASN | 721 | 7 |
| saquinavir        | 4  | ASN | 721 | 7 |
| saquinavir        | 20 | ASN | 721 | 7 |
| tamoxifen         | 16 | ASN | 721 | 7 |
| tamoxifen         | 20 | ASN | 721 | 7 |
| tariquidar        | 4  | ASN | 721 | 7 |
| tariquidar        | 7  | ASN | 721 | 7 |
| tariquidar        | 11 | ASN | 721 | 7 |

|                   |    |     |     |   |
|-------------------|----|-----|-----|---|
| valspodar         | 15 | ASN | 721 | 7 |
| valspodar         | 22 | ASN | 721 | 7 |
| valspodar         | 23 | ASN | 721 | 7 |
| verapamil         | 13 | ASN | 721 | 7 |
| vinblastine       | 22 | ASN | 721 | 7 |
| zosuquidar        | 13 | ASN | 721 | 7 |
|                   |    |     |     |   |
| 724               |    |     |     |   |
| biricodar         | 8  | LEU | 724 | 7 |
| biricodar         | 9  | LEU | 724 | 7 |
| biricodar         | 12 | LEU | 724 | 7 |
| biricodar         | 13 | LEU | 724 | 7 |
| biricodar         | 18 | LEU | 724 | 7 |
| cisZ-flupenthixol | 15 | LEU | 724 | 7 |
| cisZ-flupenthixol | 16 | LEU | 724 | 7 |
| daunorubicin      | 12 | LEU | 724 | 7 |
| daunorubicin      | 15 | LEU | 724 | 7 |
| daunorubicin      | 20 | LEU | 724 | 7 |
| daunorubicin      | 22 | LEU | 724 | 7 |
| doxorubicin       | 12 | LEU | 724 | 7 |
| doxorubicin       | 15 | LEU | 724 | 7 |
| doxorubicin       | 22 | LEU | 724 | 7 |
| elacridar         | 4  | LEU | 724 | 7 |
| elacridar         | 9  | LEU | 724 | 7 |
| elacridar         | 13 | LEU | 724 | 7 |
| elacridar         | 14 | LEU | 724 | 7 |
| elacridar         | 20 | LEU | 724 | 7 |
| hoechst33342      | 14 | LEU | 724 | 7 |
| hoechst33342      | 15 | LEU | 724 | 7 |
| hoechst33342      | 16 | LEU | 724 | 7 |
| hoechst33342      | 22 | LEU | 724 | 7 |
| ivermectin        | 15 | LEU | 724 | 7 |
| ivermectin        | 23 | LEU | 724 | 7 |
| lopinavir         | 12 | LEU | 724 | 7 |
| lopinavir         | 14 | LEU | 724 | 7 |
| paclitaxel        | 8  | LEU | 724 | 7 |
| paclitaxel        | 23 | LEU | 724 | 7 |
| QZ59S_RRR         | 3  | LEU | 724 | 7 |
| QZ59S_RRR         | 10 | LEU | 724 | 7 |
| QZ59S_RRR         | 11 | LEU | 724 | 7 |
| QZ59S_RRR         | 12 | LEU | 724 | 7 |
| QZ59S_RRR         | 13 | LEU | 724 | 7 |
| QZ59S_RRR         | 20 | LEU | 724 | 7 |
| QZ59S_RRR         | 21 | LEU | 724 | 7 |
| QZ59S_SSS         | 11 | LEU | 724 | 7 |
| QZ59S_SSS         | 14 | LEU | 724 | 7 |
| QZ59S_SSS         | 22 | LEU | 724 | 7 |
| rhodamine123      | 14 | LEU | 724 | 7 |
| rhodamine123      | 15 | LEU | 724 | 7 |
| rhodamine123      | 16 | LEU | 724 | 7 |

|              |    |     |     |   |
|--------------|----|-----|-----|---|
| rhodamine123 | 18 | LEU | 724 | 7 |
| rhodamine123 | 22 | LEU | 724 | 7 |
| ritonavir    | 6  | LEU | 724 | 7 |
| ritonavir    | 8  | LEU | 724 | 7 |
| ritonavir    | 9  | LEU | 724 | 7 |
| ritonavir    | 10 | LEU | 724 | 7 |
| ritonavir    | 12 | LEU | 724 | 7 |
| ritonavir    | 14 | LEU | 724 | 7 |
| ritonavir    | 15 | LEU | 724 | 7 |
| saquinavir   | 3  | LEU | 724 | 7 |
| saquinavir   | 4  | LEU | 724 | 7 |
| saquinavir   | 8  | LEU | 724 | 7 |
| saquinavir   | 13 | LEU | 724 | 7 |
| tamoxifen    | 13 | LEU | 724 | 7 |
| tamoxifen    | 15 | LEU | 724 | 7 |
| tamoxifen    | 16 | LEU | 724 | 7 |
| tamoxifen    | 21 | LEU | 724 | 7 |
| tamoxifen    | 22 | LEU | 724 | 7 |
| tariquidar   | 11 | LEU | 724 | 7 |
| tariquidar   | 12 | LEU | 724 | 7 |
| tariquidar   | 13 | LEU | 724 | 7 |
| tariquidar   | 16 | LEU | 724 | 7 |
| tariquidar   | 21 | LEU | 724 | 7 |
| valspodar    | 8  | LEU | 724 | 7 |
| verapamil    | 8  | LEU | 724 | 7 |
| verapamil    | 13 | LEU | 724 | 7 |
| verapamil    | 21 | LEU | 724 | 7 |
| vinblastine  | 12 | LEU | 724 | 7 |
| zosuquidar   | 10 | LEU | 724 | 7 |
| zosuquidar   | 22 | LEU | 724 | 7 |
|              |    |     |     |   |
| 758          |    |     |     |   |
| biricodar    | 12 | LEU | 758 | 8 |
| doxorubicin  | 12 | LEU | 758 | 8 |
| elacridar    | 12 | LEU | 758 | 8 |
| hoechst33342 | 11 | LEU | 758 | 8 |
| lopinavir    | 12 | LEU | 758 | 8 |
| QZ59S_RRR    | 10 | LEU | 758 | 8 |
| QZ59S_RRR    | 11 | LEU | 758 | 8 |
| QZ59S_SSS    | 11 | LEU | 758 | 8 |
| QZ59S_SSS    | 12 | LEU | 758 | 8 |
| tariquidar   | 12 | LEU | 758 | 8 |
| verapamil    | 12 | LEU | 758 | 8 |
| vinblastine  | 12 | LEU | 758 | 8 |
| zosuquidar   | 11 | LEU | 758 | 8 |
| zosuquidar   | 12 | LEU | 758 | 8 |
|              |    |     |     |   |
| 760          |    |     |     |   |
| hoechst33342 | 13 | LEU | 760 | 8 |
| hoechst33342 | 14 | LEU | 760 | 8 |
| rhodamine123 | 15 | LEU | 760 | 8 |
| rhodamine123 | 16 | LEU | 760 | 8 |



|              |    |     |     |     |
|--------------|----|-----|-----|-----|
|              |    |     |     |     |
| 764          |    |     |     |     |
| hoechst33342 | 14 | ILE | 764 | 8   |
|              |    |     |     |     |
| 768          |    |     |     |     |
| cyclosporinA | 17 | ILE | 768 | 8   |
| lopinavir    | 17 | ILE | 768 | 8   |
| lopinavir    | 18 | ILE | 768 | 8   |
| paclitaxel   | 19 | ILE | 768 | 8   |
| paclitaxel   | 20 | ILE | 768 | 8   |
| ritonavir    | 10 | ILE | 768 | 8   |
| ritonavir    | 19 | ILE | 768 | 8   |
| ritonavir    | 21 | ILE | 768 | 8   |
| saquinavir   | 16 | ILE | 768 | 8   |
| valspodar    | 15 | ILE | 768 | 8   |
| zosuquidar   | 25 | ILE | 768 | 8   |
|              |    |     |     |     |
| 833          |    |     |     |     |
| ADP          | 16 | LEU | 833 | CH9 |
| daunorubicin | 4  | LEU | 833 | CH9 |
| lopinavir    | 5  | LEU | 833 | CH9 |
| QZ59S_RRR    | 4  | LEU | 833 | CH9 |
| QZ59S_SSS    | 3  | LEU | 833 | CH9 |
| tariquidar   | 3  | LEU | 833 | CH9 |
| tariquidar   | 5  | LEU | 833 | CH9 |
|              |    |     |     |     |
| 841          |    |     |     |     |
| QZ59S_RRR    | 3  | ALA | 841 | 9   |
| QZ59S_SSS    | 4  | ALA | 841 | 9   |
| ritonavir    | 10 | ALA | 841 | 9   |
| tamoxifen    | 4  | ALA | 841 | 9   |
| tariquidar   | 4  | ALA | 841 | 9   |
| tariquidar   | 7  | ALA | 841 | 9   |
|              |    |     |     |     |
| 864          |    |     |     |     |
| rhodamine123 | 25 | ILE | 864 | 10  |
|              |    |     |     |     |
| 868          |    |     |     |     |
| rhodamine123 | 25 | ILE | 868 | 10  |
| ritonavir    | 17 | ILE | 868 | 10  |
| verapamil    | 17 | ILE | 868 | 10  |
|              |    |     |     |     |
| 872          |    |     |     |     |
| ADP          | 19 | GLY | 872 | 10  |
| ADP          | 20 | GLY | 872 | 10  |
| rhodamine123 | 25 | GLY | 872 | 10  |
| tariquidar   | 2  | GLY | 872 | 10  |
|              |    |     |     |     |
| 938          |    |     |     |     |
| ADP          | 8  | PHE | 938 | 11  |
| ADP          | 9  | PHE | 938 | 11  |
| ADP          | 14 | PHE | 938 | 11  |

|                   |    |     |     |    |
|-------------------|----|-----|-----|----|
| biricodar         | 14 | PHE | 938 | 11 |
| biricodar         | 15 | PHE | 938 | 11 |
| biricodar         | 17 | PHE | 938 | 11 |
| biricodar         | 20 | PHE | 938 | 11 |
| biricodar         | 25 | PHE | 938 | 11 |
| cisZ-flupenthixol | 3  | PHE | 938 | 11 |
| cisZ-flupenthixol | 18 | PHE | 938 | 11 |
| cyclosporinA      | 9  | PHE | 938 | 11 |
| cyclosporinA      | 10 | PHE | 938 | 11 |
| cyclosporinA      | 12 | PHE | 938 | 11 |
| cyclosporinA      | 13 | PHE | 938 | 11 |
| daunorubicin      | 0  | PHE | 938 | 11 |
| daunorubicin      | 23 | PHE | 938 | 11 |
| daunorubicin      | 24 | PHE | 938 | 11 |
| doxorubicin       | 6  | PHE | 938 | 11 |
| doxorubicin       | 17 | PHE | 938 | 11 |
| doxorubicin       | 20 | PHE | 938 | 11 |
| doxorubicin       | 21 | PHE | 938 | 11 |
| doxorubicin       | 23 | PHE | 938 | 11 |
| doxorubicin       | 24 | PHE | 938 | 11 |
| elacridar         | 11 | PHE | 938 | 11 |
| elacridar         | 17 | PHE | 938 | 11 |
| elacridar         | 18 | PHE | 938 | 11 |
| elacridar         | 24 | PHE | 938 | 11 |
| hoechst33342      | 10 | PHE | 938 | 11 |
| hoechst33342      | 24 | PHE | 938 | 11 |
| ivermectin        | 8  | PHE | 938 | 11 |
| ivermectin        | 13 | PHE | 938 | 11 |
| ivermectin        | 22 | PHE | 938 | 11 |
| ivermectin        | 25 | PHE | 938 | 11 |
| lopinavir         | 9  | PHE | 938 | 11 |
| lopinavir         | 11 | PHE | 938 | 11 |
| lopinavir         | 15 | PHE | 938 | 11 |
| lopinavir         | 19 | PHE | 938 | 11 |
| lopinavir         | 20 | PHE | 938 | 11 |
| lopinavir         | 24 | PHE | 938 | 11 |
| lopinavir         | 25 | PHE | 938 | 11 |
| paclitaxel        | 13 | PHE | 938 | 11 |
| paclitaxel        | 14 | PHE | 938 | 11 |
| paclitaxel        | 16 | PHE | 938 | 11 |
| QZ59S_SSS         | 10 | PHE | 938 | 11 |
| QZ59S_SSS         | 18 | PHE | 938 | 11 |
| QZ59S_SSS         | 24 | PHE | 938 | 11 |
| QZ59S_SSS         | 25 | PHE | 938 | 11 |
| rhodamine123      | 0  | PHE | 938 | 11 |
| rhodamine123      | 20 | PHE | 938 | 11 |
| ritonavir         | 3  | PHE | 938 | 11 |
| ritonavir         | 7  | PHE | 938 | 11 |
| ritonavir         | 13 | PHE | 938 | 11 |
| ritonavir         | 20 | PHE | 938 | 11 |

|              |    |     |     |    |
|--------------|----|-----|-----|----|
| ritonavir    | 23 | PHE | 938 | 11 |
| ritonavir    | 24 | PHE | 938 | 11 |
| ritonavir    | 25 | PHE | 938 | 11 |
| saquinavir   | 9  | PHE | 938 | 11 |
| saquinavir   | 11 | PHE | 938 | 11 |
| saquinavir   | 12 | PHE | 938 | 11 |
| saquinavir   | 14 | PHE | 938 | 11 |
| saquinavir   | 15 | PHE | 938 | 11 |
| saquinavir   | 19 | PHE | 938 | 11 |
| saquinavir   | 24 | PHE | 938 | 11 |
| tamoxifen    | 6  | PHE | 938 | 11 |
| tamoxifen    | 14 | PHE | 938 | 11 |
| tamoxifen    | 17 | PHE | 938 | 11 |
| tamoxifen    | 18 | PHE | 938 | 11 |
| tamoxifen    | 25 | PHE | 938 | 11 |
| tariquidar   | 2  | PHE | 938 | 11 |
| tariquidar   | 14 | PHE | 938 | 11 |
| tariquidar   | 15 | PHE | 938 | 11 |
| tariquidar   | 17 | PHE | 938 | 11 |
| tariquidar   | 19 | PHE | 938 | 11 |
| tariquidar   | 20 | PHE | 938 | 11 |
| tariquidar   | 23 | PHE | 938 | 11 |
| tariquidar   | 24 | PHE | 938 | 11 |
| tariquidar   | 25 | PHE | 938 | 11 |
| valspodar    | 9  | PHE | 938 | 11 |
| valspodar    | 11 | PHE | 938 | 11 |
| valspodar    | 13 | PHE | 938 | 11 |
| valspodar    | 14 | PHE | 938 | 11 |
| valspodar    | 16 | PHE | 938 | 11 |
| valspodar    | 18 | PHE | 938 | 11 |
| verapamil    | 11 | PHE | 938 | 11 |
| verapamil    | 15 | PHE | 938 | 11 |
| verapamil    | 17 | PHE | 938 | 11 |
| verapamil    | 19 | PHE | 938 | 11 |
| verapamil    | 25 | PHE | 938 | 11 |
| vinblastine  | 8  | PHE | 938 | 11 |
| vinblastine  | 11 | PHE | 938 | 11 |
| vinblastine  | 15 | PHE | 938 | 11 |
| vinblastine  | 16 | PHE | 938 | 11 |
| vinblastine  | 17 | PHE | 938 | 11 |
| vinblastine  | 18 | PHE | 938 | 11 |
| vinblastine  | 19 | PHE | 938 | 11 |
| vinblastine  | 20 | PHE | 938 | 11 |
| vinblastine  | 21 | PHE | 938 | 11 |
| zosuquidar   | 2  | PHE | 938 | 11 |
| zosuquidar   | 5  | PHE | 938 | 11 |
| zosuquidar   | 6  | PHE | 938 | 11 |
| zosuquidar   | 14 | PHE | 938 | 11 |
|              |    |     |     |    |
| 941          |    |     |     |    |
| daunorubicin | 21 | THR | 941 | 11 |
| doxorubicin  | 21 | THR | 941 | 11 |

|                   |    |     |     |    |
|-------------------|----|-----|-----|----|
| hoechst33342      | 10 | THR | 941 | 11 |
| lopinavir         | 0  | THR | 941 | 11 |
| ritonavir         | 13 | THR | 941 | 11 |
| verapamil         | 11 | THR | 941 | 11 |
| verapamil         | 17 | THR | 941 | 11 |
|                   |    |     |     |    |
| 942               |    |     |     |    |
| biricodar         | 2  | PHE | 942 | 11 |
| biricodar         | 14 | PHE | 942 | 11 |
| biricodar         | 16 | PHE | 942 | 11 |
| biricodar         | 17 | PHE | 942 | 11 |
| biricodar         | 19 | PHE | 942 | 11 |
| biricodar         | 20 | PHE | 942 | 11 |
| biricodar         | 24 | PHE | 942 | 11 |
| biricodar         | 25 | PHE | 942 | 11 |
| cisZ-flupenthixol | 18 | PHE | 942 | 11 |
| cisZ-flupenthixol | 19 | PHE | 942 | 11 |
| cisZ-flupenthixol | 25 | PHE | 942 | 11 |
| cyclosporinA      | 4  | PHE | 942 | 11 |
| cyclosporinA      | 7  | PHE | 942 | 11 |
| cyclosporinA      | 9  | PHE | 942 | 11 |
| cyclosporinA      | 10 | PHE | 942 | 11 |
| cyclosporinA      | 13 | PHE | 942 | 11 |
| cyclosporinA      | 14 | PHE | 942 | 11 |
| cyclosporinA      | 15 | PHE | 942 | 11 |
| cyclosporinA      | 22 | PHE | 942 | 11 |
| cyclosporinA      | 23 | PHE | 942 | 11 |
| cyclosporinA      | 24 | PHE | 942 | 11 |
| cyclosporinA      | 25 | PHE | 942 | 11 |
| daunorubicin      | 0  | PHE | 942 | 11 |
| daunorubicin      | 21 | PHE | 942 | 11 |
| daunorubicin      | 24 | PHE | 942 | 11 |
| doxorubicin       | 17 | PHE | 942 | 11 |
| doxorubicin       | 18 | PHE | 942 | 11 |
| doxorubicin       | 21 | PHE | 942 | 11 |
| doxorubicin       | 23 | PHE | 942 | 11 |
| doxorubicin       | 24 | PHE | 942 | 11 |
| elacridar         | 3  | PHE | 942 | 11 |
| elacridar         | 7  | PHE | 942 | 11 |
| elacridar         | 10 | PHE | 942 | 11 |
| elacridar         | 11 | PHE | 942 | 11 |
| elacridar         | 17 | PHE | 942 | 11 |
| elacridar         | 18 | PHE | 942 | 11 |
| elacridar         | 19 | PHE | 942 | 11 |
| elacridar         | 20 | PHE | 942 | 11 |
| elacridar         | 23 | PHE | 942 | 11 |
| elacridar         | 24 | PHE | 942 | 11 |
| hoechst33342      | 0  | PHE | 942 | 11 |
| hoechst33342      | 8  | PHE | 942 | 11 |

|              |    |     |     |    |
|--------------|----|-----|-----|----|
| hoechst33342 | 12 | PHE | 942 | 11 |
| hoechst33342 | 23 | PHE | 942 | 11 |
| hoechst33342 | 24 | PHE | 942 | 11 |
| hoechst33342 | 25 | PHE | 942 | 11 |
| ivermectin   | 8  | PHE | 942 | 11 |
| ivermectin   | 13 | PHE | 942 | 11 |
| ivermectin   | 20 | PHE | 942 | 11 |
| ivermectin   | 22 | PHE | 942 | 11 |
| ivermectin   | 24 | PHE | 942 | 11 |
| ivermectin   | 25 | PHE | 942 | 11 |
| lopinavir    | 9  | PHE | 942 | 11 |
| lopinavir    | 11 | PHE | 942 | 11 |
| lopinavir    | 15 | PHE | 942 | 11 |
| lopinavir    | 19 | PHE | 942 | 11 |
| lopinavir    | 20 | PHE | 942 | 11 |
| lopinavir    | 23 | PHE | 942 | 11 |
| paclitaxel   | 7  | PHE | 942 | 11 |
| paclitaxel   | 10 | PHE | 942 | 11 |
| paclitaxel   | 13 | PHE | 942 | 11 |
| paclitaxel   | 16 | PHE | 942 | 11 |
| paclitaxel   | 21 | PHE | 942 | 11 |
| paclitaxel   | 24 | PHE | 942 | 11 |
| paclitaxel   | 25 | PHE | 942 | 11 |
| QZ59S_RRR    | 18 | PHE | 942 | 11 |
| QZ59S_RRR    | 22 | PHE | 942 | 11 |
| QZ59S_RRR    | 23 | PHE | 942 | 11 |
| QZ59S_RRR    | 24 | PHE | 942 | 11 |
| QZ59S_RRR    | 25 | PHE | 942 | 11 |
| QZ59S_SSS    | 7  | PHE | 942 | 11 |
| QZ59S_SSS    | 18 | PHE | 942 | 11 |
| QZ59S_SSS    | 19 | PHE | 942 | 11 |
| QZ59S_SSS    | 20 | PHE | 942 | 11 |
| QZ59S_SSS    | 21 | PHE | 942 | 11 |
| rhodamine123 | 19 | PHE | 942 | 11 |
| ritonavir    | 3  | PHE | 942 | 11 |
| ritonavir    | 13 | PHE | 942 | 11 |
| ritonavir    | 17 | PHE | 942 | 11 |
| ritonavir    | 20 | PHE | 942 | 11 |
| ritonavir    | 23 | PHE | 942 | 11 |
| ritonavir    | 24 | PHE | 942 | 11 |
| ritonavir    | 25 | PHE | 942 | 11 |
| saquinavir   | 6  | PHE | 942 | 11 |
| saquinavir   | 7  | PHE | 942 | 11 |
| saquinavir   | 10 | PHE | 942 | 11 |
| saquinavir   | 12 | PHE | 942 | 11 |
| saquinavir   | 14 | PHE | 942 | 11 |
| saquinavir   | 17 | PHE | 942 | 11 |
| saquinavir   | 18 | PHE | 942 | 11 |
| saquinavir   | 19 | PHE | 942 | 11 |
| saquinavir   | 21 | PHE | 942 | 11 |
| saquinavir   | 24 | PHE | 942 | 11 |
| saquinavir   | 25 | PHE | 942 | 11 |

|              |    |     |     |    |
|--------------|----|-----|-----|----|
| tamoxifen    | 14 | PHE | 942 | 11 |
| tamoxifen    | 17 | PHE | 942 | 11 |
| tamoxifen    | 18 | PHE | 942 | 11 |
| tamoxifen    | 19 | PHE | 942 | 11 |
| tariquidar   | 2  | PHE | 942 | 11 |
| tariquidar   | 15 | PHE | 942 | 11 |
| tariquidar   | 17 | PHE | 942 | 11 |
| tariquidar   | 19 | PHE | 942 | 11 |
| tariquidar   | 20 | PHE | 942 | 11 |
| tariquidar   | 21 | PHE | 942 | 11 |
| tariquidar   | 24 | PHE | 942 | 11 |
| tariquidar   | 25 | PHE | 942 | 11 |
| valspodar    | 7  | PHE | 942 | 11 |
| valspodar    | 9  | PHE | 942 | 11 |
| valspodar    | 11 | PHE | 942 | 11 |
| valspodar    | 13 | PHE | 942 | 11 |
| valspodar    | 14 | PHE | 942 | 11 |
| valspodar    | 16 | PHE | 942 | 11 |
| valspodar    | 18 | PHE | 942 | 11 |
| valspodar    | 23 | PHE | 942 | 11 |
| valspodar    | 24 | PHE | 942 | 11 |
| verapamil    | 11 | PHE | 942 | 11 |
| verapamil    | 15 | PHE | 942 | 11 |
| verapamil    | 17 | PHE | 942 | 11 |
| verapamil    | 19 | PHE | 942 | 11 |
| verapamil    | 23 | PHE | 942 | 11 |
| vinblastine  | 2  | PHE | 942 | 11 |
| vinblastine  | 8  | PHE | 942 | 11 |
| vinblastine  | 9  | PHE | 942 | 11 |
| vinblastine  | 10 | PHE | 942 | 11 |
| vinblastine  | 13 | PHE | 942 | 11 |
| vinblastine  | 14 | PHE | 942 | 11 |
| vinblastine  | 16 | PHE | 942 | 11 |
| vinblastine  | 19 | PHE | 942 | 11 |
| vinblastine  | 20 | PHE | 942 | 11 |
| vinblastine  | 22 | PHE | 942 | 11 |
| vinblastine  | 25 | PHE | 942 | 11 |
| zosuquidar   | 17 | PHE | 942 | 11 |
| zosuquidar   | 18 | PHE | 942 | 11 |
| zosuquidar   | 19 | PHE | 942 | 11 |
| zosuquidar   | 20 | PHE | 942 | 11 |
|              |    |     |     |    |
| 945          |    |     |     |    |
| daunorubicin | 21 | THR | 945 | 11 |
| hoechst33342 | 10 | THR | 945 | 11 |
| lopinavir    | 0  | THR | 945 | 11 |
| ritonavir    | 3  | THR | 945 | 11 |
| ritonavir    | 13 | THR | 945 | 11 |
| ritonavir    | 17 | THR | 945 | 11 |
| saquinavir   | 10 | THR | 945 | 11 |
| saquinavir   | 14 | THR | 945 | 11 |
| saquinavir   | 21 | THR | 945 | 11 |

|                   |    |     |     |    |
|-------------------|----|-----|-----|----|
| verapamil         | 17 | THR | 945 | 11 |
| vinblastine       | 0  | THR | 945 | 11 |
| vinblastine       | 2  | THR | 945 | 11 |
|                   |    |     |     |    |
| 946               |    |     |     |    |
| biricodar         | 0  | GLN | 946 | 11 |
| biricodar         | 2  | GLN | 946 | 11 |
| biricodar         | 6  | GLN | 946 | 11 |
| biricodar         | 10 | GLN | 946 | 11 |
| biricodar         | 11 | GLN | 946 | 11 |
| biricodar         | 13 | GLN | 946 | 11 |
| biricodar         | 19 | GLN | 946 | 11 |
| biricodar         | 20 | GLN | 946 | 11 |
| biricodar         | 24 | GLN | 946 | 11 |
| cisZ-flupenthixol | 19 | GLN | 946 | 11 |
| cyclosporinA      | 4  | GLN | 946 | 11 |
| cyclosporinA      | 7  | GLN | 946 | 11 |
| cyclosporinA      | 9  | GLN | 946 | 11 |
| cyclosporinA      | 13 | GLN | 946 | 11 |
| cyclosporinA      | 22 | GLN | 946 | 11 |
| cyclosporinA      | 24 | GLN | 946 | 11 |
| cyclosporinA      | 25 | GLN | 946 | 11 |
| daunorubicin      | 0  | GLN | 946 | 11 |
| daunorubicin      | 18 | GLN | 946 | 11 |
| daunorubicin      | 21 | GLN | 946 | 11 |
| doxorubicin       | 18 | GLN | 946 | 11 |
| elacridar         | 3  | GLN | 946 | 11 |
| elacridar         | 7  | GLN | 946 | 11 |
| elacridar         | 19 | GLN | 946 | 11 |
| elacridar         | 20 | GLN | 946 | 11 |
| hoechst33342      | 0  | GLN | 946 | 11 |
| hoechst33342      | 8  | GLN | 946 | 11 |
| hoechst33342      | 9  | GLN | 946 | 11 |
| hoechst33342      | 12 | GLN | 946 | 11 |
| hoechst33342      | 18 | GLN | 946 | 11 |
| hoechst33342      | 23 | GLN | 946 | 11 |
| ivermectin        | 22 | GLN | 946 | 11 |
| ivermectin        | 24 | GLN | 946 | 11 |
| lopinavir         | 20 | GLN | 946 | 11 |
| lopinavir         | 23 | GLN | 946 | 11 |
| paclitaxel        | 7  | GLN | 946 | 11 |
| paclitaxel        | 10 | GLN | 946 | 11 |
| paclitaxel        | 21 | GLN | 946 | 11 |
| QZ59S_RRR         | 14 | GLN | 946 | 11 |
| QZ59S_RRR         | 18 | GLN | 946 | 11 |
| QZ59S_RRR         | 23 | GLN | 946 | 11 |
| QZ59S_RRR         | 24 | GLN | 946 | 11 |
| QZ59S_RRR         | 25 | GLN | 946 | 11 |
| QZ59S_SSS         | 2  | GLN | 946 | 11 |
| QZ59S_SSS         | 7  | GLN | 946 | 11 |
| QZ59S_SSS         | 19 | GLN | 946 | 11 |

|                   |    |     |     |    |
|-------------------|----|-----|-----|----|
| QZ59S_SSS         | 20 | GLN | 946 | 11 |
| QZ59S_SSS         | 21 | GLN | 946 | 11 |
| QZ59S_SSS         | 22 | GLN | 946 | 11 |
| QZ59S_SSS         | 23 | GLN | 946 | 11 |
| rhodamine123      | 19 | GLN | 946 | 11 |
| ritonavir         | 3  | GLN | 946 | 11 |
| ritonavir         | 4  | GLN | 946 | 11 |
| ritonavir         | 17 | GLN | 946 | 11 |
| ritonavir         | 23 | GLN | 946 | 11 |
| saquinavir        | 0  | GLN | 946 | 11 |
| saquinavir        | 6  | GLN | 946 | 11 |
| saquinavir        | 7  | GLN | 946 | 11 |
| saquinavir        | 10 | GLN | 946 | 11 |
| saquinavir        | 14 | GLN | 946 | 11 |
| saquinavir        | 18 | GLN | 946 | 11 |
| saquinavir        | 21 | GLN | 946 | 11 |
| tamoxifen         | 14 | GLN | 946 | 11 |
| tamoxifen         | 19 | GLN | 946 | 11 |
| tamoxifen         | 21 | GLN | 946 | 11 |
| tamoxifen         | 23 | GLN | 946 | 11 |
| tariquidar        | 10 | GLN | 946 | 11 |
| tariquidar        | 17 | GLN | 946 | 11 |
| tariquidar        | 21 | GLN | 946 | 11 |
| valspodar         | 24 | GLN | 946 | 11 |
| verapamil         | 10 | GLN | 946 | 11 |
| verapamil         | 23 | GLN | 946 | 11 |
| vinblastine       | 2  | GLN | 946 | 11 |
| vinblastine       | 6  | GLN | 946 | 11 |
| vinblastine       | 7  | GLN | 946 | 11 |
| vinblastine       | 8  | GLN | 946 | 11 |
| zosuquidar        | 17 | GLN | 946 | 11 |
| zosuquidar        | 19 | GLN | 946 | 11 |
| zosuquidar        | 20 | GLN | 946 | 11 |
|                   |    |     |     |    |
| 949               |    |     |     |    |
| biricodar         | 0  | MET | 949 | 11 |
| biricodar         | 6  | MET | 949 | 11 |
| biricodar         | 13 | MET | 949 | 11 |
| biricodar         | 19 | MET | 949 | 11 |
| biricodar         | 20 | MET | 949 | 11 |
| cisZ-flupenthixol | 19 | MET | 949 | 11 |
| cyclosporinA      | 7  | MET | 949 | 11 |
| cyclosporinA      | 22 | MET | 949 | 11 |
| daunorubicin      | 18 | MET | 949 | 11 |
| doxorubicin       | 1  | MET | 949 | 11 |
| doxorubicin       | 18 | MET | 949 | 11 |
| elacridar         | 3  | MET | 949 | 11 |
| elacridar         | 17 | MET | 949 | 11 |
| elacridar         | 20 | MET | 949 | 11 |
| hoechst33342      | 0  | MET | 949 | 11 |
| hoechst33342      | 8  | MET | 949 | 11 |



|                   |    |     |     |         |
|-------------------|----|-----|-----|---------|
| hoechst33342      | 9  | MET | 949 | 11      |
| ivermectin        | 0  | MET | 949 | 11      |
| ivermectin        | 1  | MET | 949 | 11      |
| ivermectin        | 6  | MET | 949 | 11      |
| ivermectin        | 22 | MET | 949 | 11      |
| lopinavir         | 20 | MET | 949 | 11      |
| QZ59S_RRR         | 0  | MET | 949 | 11      |
| QZ59S_RRR         | 21 | MET | 949 | 11      |
| QZ59S_SSS         | 2  | MET | 949 | 11      |
| QZ59S_SSS         | 21 | MET | 949 | 11      |
| QZ59S_SSS         | 22 | MET | 949 | 11      |
| rhodamine123      | 19 | MET | 949 | 11      |
| rhodamine123      | 22 | MET | 949 | 11      |
| rhodamine123      | 25 | MET | 949 | 11      |
| ritonavir         | 1  | MET | 949 | 11      |
| ritonavir         | 3  | MET | 949 | 11      |
| ritonavir         | 4  | MET | 949 | 11      |
| ritonavir         | 11 | MET | 949 | 11      |
| saquinavir        | 0  | MET | 949 | 11      |
| saquinavir        | 4  | MET | 949 | 11      |
| saquinavir        | 10 | MET | 949 | 11      |
| saquinavir        | 13 | MET | 949 | 11      |
| tamoxifen         | 19 | MET | 949 | 11      |
| tariquidar        | 0  | MET | 949 | 11      |
| tariquidar        | 10 | MET | 949 | 11      |
| verapamil         | 10 | MET | 949 | 11      |
| vinblastine       | 1  | MET | 949 | 11      |
| vinblastine       | 2  | MET | 949 | 11      |
| vinblastine       | 6  | MET | 949 | 11      |
| vinblastine       | 7  | MET | 949 | 11      |
| zosuquidar        | 20 | MET | 949 | 11      |
|                   |    |     |     |         |
| 971               |    |     |     |         |
| cisZ-flupenthixol | 5  | PHE | 971 | EL11-12 |
| cisZ-flupenthixol | 23 | PHE | 971 | EL11-12 |
| daunorubicin      | 7  | PHE | 971 | EL11-12 |
| daunorubicin      | 8  | PHE | 971 | EL11-12 |
| daunorubicin      | 14 | PHE | 971 | EL11-12 |
| daunorubicin      | 16 | PHE | 971 | EL11-12 |
| doxorubicin       | 8  | PHE | 971 | EL11-12 |
| doxorubicin       | 14 | PHE | 971 | EL11-12 |
| hoechst33342      | 2  | PHE | 971 | EL11-12 |
| hoechst33342      | 6  | PHE | 971 | EL11-12 |
| hoechst33342      | 12 | PHE | 971 | EL11-12 |
| QZ59S_RRR         | 16 | PHE | 971 | EL11-12 |
| QZ59S_RRR         | 17 | PHE | 971 | EL11-12 |
| QZ59S_SSS         | 8  | PHE | 971 | EL11-12 |
| QZ59S_SSS         | 9  | PHE | 971 | EL11-12 |
| rhodamine123      | 6  | PHE | 971 | EL11-12 |
| rhodamine123      | 7  | PHE | 971 | EL11-12 |

|                   |    |     |     |         |
|-------------------|----|-----|-----|---------|
| rhodamine123      | 8  | PHE | 971 | EL11-12 |
| ritonavir         | 11 | PHE | 971 | EL11-12 |
| verapamil         | 9  | PHE | 971 | EL11-12 |
| zosuquidar        | 16 | PHE | 971 | EL11-12 |
| zosuquidar        | 21 | PHE | 971 | EL11-12 |
|                   |    |     |     |         |
| 974               |    |     |     |         |
| cisZ-flupenthixol | 23 | VAL | 974 | EH12    |
| daunorubicin      | 14 | VAL | 974 | EH12    |
| doxorubicin       | 14 | VAL | 974 | EH12    |
| QZ59S_RRR         | 16 | VAL | 974 | EH12    |
| QZ59S_RRR         | 17 | VAL | 974 | EH12    |
|                   |    |     |     |         |
| 975               |    |     |     |         |
| biricodar         | 5  | LEU | 975 | EH12    |
| biricodar         | 7  | LEU | 975 | EH12    |
| biricodar         | 13 | LEU | 975 | EH12    |
| cisZ-flupenthixol | 0  | LEU | 975 | EH12    |
| cisZ-flupenthixol | 1  | LEU | 975 | EH12    |
| cisZ-flupenthixol | 2  | LEU | 975 | EH12    |
| cisZ-flupenthixol | 4  | LEU | 975 | EH12    |
| cisZ-flupenthixol | 5  | LEU | 975 | EH12    |
| cisZ-flupenthixol | 6  | LEU | 975 | EH12    |
| cisZ-flupenthixol | 7  | LEU | 975 | EH12    |
| cisZ-flupenthixol | 10 | LEU | 975 | EH12    |
| cisZ-flupenthixol | 17 | LEU | 975 | EH12    |
| cisZ-flupenthixol | 20 | LEU | 975 | EH12    |
| cisZ-flupenthixol | 21 | LEU | 975 | EH12    |
| cisZ-flupenthixol | 23 | LEU | 975 | EH12    |
| cisZ-flupenthixol | 24 | LEU | 975 | EH12    |
| daunorubicin      | 1  | LEU | 975 | EH12    |
| daunorubicin      | 3  | LEU | 975 | EH12    |
| daunorubicin      | 5  | LEU | 975 | EH12    |
| daunorubicin      | 6  | LEU | 975 | EH12    |
| daunorubicin      | 7  | LEU | 975 | EH12    |
| daunorubicin      | 10 | LEU | 975 | EH12    |
| daunorubicin      | 14 | LEU | 975 | EH12    |
| daunorubicin      | 15 | LEU | 975 | EH12    |

|              |    |     |     |      |
|--------------|----|-----|-----|------|
| daunorubicin | 16 | LEU | 975 | EH12 |
| daunorubicin | 17 | LEU | 975 | EH12 |
| daunorubicin | 22 | LEU | 975 | EH12 |
| doxorubicin  | 5  | LEU | 975 | EH12 |
| doxorubicin  | 7  | LEU | 975 | EH12 |
| doxorubicin  | 8  | LEU | 975 | EH12 |
| doxorubicin  | 9  | LEU | 975 | EH12 |
| doxorubicin  | 10 | LEU | 975 | EH12 |
| doxorubicin  | 13 | LEU | 975 | EH12 |
| doxorubicin  | 14 | LEU | 975 | EH12 |
| doxorubicin  | 15 | LEU | 975 | EH12 |
| doxorubicin  | 16 | LEU | 975 | EH12 |
| elacridar    | 3  | LEU | 975 | EH12 |
| elacridar    | 5  | LEU | 975 | EH12 |
| elacridar    | 6  | LEU | 975 | EH12 |
| elacridar    | 7  | LEU | 975 | EH12 |
| elacridar    | 9  | LEU | 975 | EH12 |
| elacridar    | 21 | LEU | 975 | EH12 |
| hoechst33342 | 2  | LEU | 975 | EH12 |
| hoechst33342 | 4  | LEU | 975 | EH12 |
| hoechst33342 | 5  | LEU | 975 | EH12 |
| hoechst33342 | 6  | LEU | 975 | EH12 |
| hoechst33342 | 7  | LEU | 975 | EH12 |
| hoechst33342 | 12 | LEU | 975 | EH12 |
| hoechst33342 | 17 | LEU | 975 | EH12 |
| ivermectin   | 1  | LEU | 975 | EH12 |
| ivermectin   | 5  | LEU | 975 | EH12 |
| ivermectin   | 6  | LEU | 975 | EH12 |
| lopinavir    | 13 | LEU | 975 | EH12 |
| QZ59S_RRR    | 2  | LEU | 975 | EH12 |
| QZ59S_RRR    | 5  | LEU | 975 | EH12 |
| QZ59S_RRR    | 9  | LEU | 975 | EH12 |
| QZ59S_RRR    | 16 | LEU | 975 | EH12 |
| QZ59S_RRR    | 17 | LEU | 975 | EH12 |
| QZ59S_RRR    | 20 | LEU | 975 | EH12 |
| QZ59S_SSS    | 5  | LEU | 975 | EH12 |
| QZ59S_SSS    | 8  | LEU | 975 | EH12 |
| QZ59S_SSS    | 9  | LEU | 975 | EH12 |
| rhodamine123 | 1  | LEU | 975 | EH12 |
| rhodamine123 | 3  | LEU | 975 | EH12 |
| rhodamine123 | 4  | LEU | 975 | EH12 |
| rhodamine123 | 5  | LEU | 975 | EH12 |
| rhodamine123 | 6  | LEU | 975 | EH12 |
| rhodamine123 | 7  | LEU | 975 | EH12 |
| rhodamine123 | 8  | LEU | 975 | EH12 |
| rhodamine123 | 10 | LEU | 975 | EH12 |
| rhodamine123 | 21 | LEU | 975 | EH12 |
| ritonavir    | 11 | LEU | 975 | EH12 |
| tamoxifen    | 1  | LEU | 975 | EH12 |
| tamoxifen    | 2  | LEU | 975 | EH12 |
| tamoxifen    | 3  | LEU | 975 | EH12 |
| tamoxifen    | 5  | LEU | 975 | EH12 |

|                   |    |     |     |      |
|-------------------|----|-----|-----|------|
| tamoxifen         | 7  | LEU | 975 | EH12 |
| tamoxifen         | 9  | LEU | 975 | EH12 |
| tamoxifen         | 10 | LEU | 975 | EH12 |
| tamoxifen         | 13 | LEU | 975 | EH12 |
| tamoxifen         | 15 | LEU | 975 | EH12 |
| tamoxifen         | 22 | LEU | 975 | EH12 |
| tariquidar        | 0  | LEU | 975 | EH12 |
| tariquidar        | 6  | LEU | 975 | EH12 |
| tariquidar        | 7  | LEU | 975 | EH12 |
| tariquidar        | 9  | LEU | 975 | EH12 |
| tariquidar        | 12 | LEU | 975 | EH12 |
| tariquidar        | 13 | LEU | 975 | EH12 |
| verapamil         | 3  | LEU | 975 | EH12 |
| verapamil         | 4  | LEU | 975 | EH12 |
| verapamil         | 5  | LEU | 975 | EH12 |
| verapamil         | 7  | LEU | 975 | EH12 |
| verapamil         | 9  | LEU | 975 | EH12 |
| verapamil         | 10 | LEU | 975 | EH12 |
| verapamil         | 14 | LEU | 975 | EH12 |
| verapamil         | 21 | LEU | 975 | EH12 |
| zosuquidar        | 1  | LEU | 975 | EH12 |
| zosuquidar        | 3  | LEU | 975 | EH12 |
| zosuquidar        | 9  | LEU | 975 | EH12 |
| zosuquidar        | 16 | LEU | 975 | EH12 |
| zosuquidar        | 21 | LEU | 975 | EH12 |
| zosuquidar        | 22 | LEU | 975 | EH12 |
|                   |    |     |     |      |
| 978               |    |     |     |      |
| biricodar         | 0  | PHE | 978 | 12   |
| biricodar         | 2  | PHE | 978 | 12   |
| biricodar         | 5  | PHE | 978 | 12   |
| biricodar         | 6  | PHE | 978 | 12   |
| biricodar         | 7  | PHE | 978 | 12   |
| biricodar         | 10 | PHE | 978 | 12   |
| cisZ-flupenthixol | 0  | PHE | 978 | 12   |
| cisZ-flupenthixol | 1  | PHE | 978 | 12   |
| cisZ-flupenthixol | 2  | PHE | 978 | 12   |
| cisZ-flupenthixol | 4  | PHE | 978 | 12   |
| cisZ-flupenthixol | 6  | PHE | 978 | 12   |
| cisZ-flupenthixol | 7  | PHE | 978 | 12   |
| cisZ-flupenthixol | 10 | PHE | 978 | 12   |
| cisZ-flupenthixol | 22 | PHE | 978 | 12   |
| cisZ-flupenthixol | 23 | PHE | 978 | 12   |

|                   |    |     |     |    |
|-------------------|----|-----|-----|----|
| cisZ-flupenthixol | 24 | PHE | 978 | 12 |
| daunorubicin      | 1  | PHE | 978 | 12 |
| daunorubicin      | 2  | PHE | 978 | 12 |
| daunorubicin      | 3  | PHE | 978 | 12 |
| daunorubicin      | 5  | PHE | 978 | 12 |
| daunorubicin      | 6  | PHE | 978 | 12 |
| daunorubicin      | 10 | PHE | 978 | 12 |
| daunorubicin      | 22 | PHE | 978 | 12 |
| doxorubicin       | 2  | PHE | 978 | 12 |
| doxorubicin       | 3  | PHE | 978 | 12 |
| doxorubicin       | 5  | PHE | 978 | 12 |
| doxorubicin       | 7  | PHE | 978 | 12 |
| doxorubicin       | 9  | PHE | 978 | 12 |
| doxorubicin       | 10 | PHE | 978 | 12 |
| doxorubicin       | 22 | PHE | 978 | 12 |
| elacridar         | 1  | PHE | 978 | 12 |
| elacridar         | 2  | PHE | 978 | 12 |
| elacridar         | 3  | PHE | 978 | 12 |
| elacridar         | 4  | PHE | 978 | 12 |
| elacridar         | 6  | PHE | 978 | 12 |
| elacridar         | 7  | PHE | 978 | 12 |
| elacridar         | 9  | PHE | 978 | 12 |
| elacridar         | 10 | PHE | 978 | 12 |
| hoechst33342      | 2  | PHE | 978 | 12 |
| hoechst33342      | 8  | PHE | 978 | 12 |
| hoechst33342      | 9  | PHE | 978 | 12 |
| hoechst33342      | 22 | PHE | 978 | 12 |
| hoechst33342      | 23 | PHE | 978 | 12 |
| hoechst33342      | 25 | PHE | 978 | 12 |
| ivermectin        | 0  | PHE | 978 | 12 |
| ivermectin        | 1  | PHE | 978 | 12 |
| ivermectin        | 3  | PHE | 978 | 12 |
| ivermectin        | 5  | PHE | 978 | 12 |
| ivermectin        | 6  | PHE | 978 | 12 |
| lopinavir         | 10 | PHE | 978 | 12 |
| paclitaxel        | 7  | PHE | 978 | 12 |
| paclitaxel        | 8  | PHE | 978 | 12 |
| QZ59S_RRR         | 0  | PHE | 978 | 12 |
| QZ59S_RRR         | 1  | PHE | 978 | 12 |
| QZ59S_RRR         | 2  | PHE | 978 | 12 |
| QZ59S_RRR         | 6  | PHE | 978 | 12 |
| QZ59S_RRR         | 9  | PHE | 978 | 12 |
| QZ59S_SSS         | 2  | PHE | 978 | 12 |
| QZ59S_SSS         | 5  | PHE | 978 | 12 |
| QZ59S_SSS         | 6  | PHE | 978 | 12 |
| rhodamine123      | 1  | PHE | 978 | 12 |
| rhodamine123      | 3  | PHE | 978 | 12 |
| rhodamine123      | 4  | PHE | 978 | 12 |
| rhodamine123      | 5  | PHE | 978 | 12 |
| rhodamine123      | 6  | PHE | 978 | 12 |
| rhodamine123      | 7  | PHE | 978 | 12 |

|              |    |     |     |    |
|--------------|----|-----|-----|----|
| rhodamine123 | 10 | PHE | 978 | 12 |
| rhodamine123 | 22 | PHE | 978 | 12 |
| rhodamine123 | 23 | PHE | 978 | 12 |
| ritonavir    | 4  | PHE | 978 | 12 |
| saquinavir   | 10 | PHE | 978 | 12 |
| tamoxifen    | 1  | PHE | 978 | 12 |
| tamoxifen    | 2  | PHE | 978 | 12 |
| tamoxifen    | 3  | PHE | 978 | 12 |
| tamoxifen    | 5  | PHE | 978 | 12 |
| tamoxifen    | 7  | PHE | 978 | 12 |
| tamoxifen    | 9  | PHE | 978 | 12 |
| tamoxifen    | 10 | PHE | 978 | 12 |
| tamoxifen    | 22 | PHE | 978 | 12 |
| tamoxifen    | 23 | PHE | 978 | 12 |
| tariquidar   | 0  | PHE | 978 | 12 |
| tariquidar   | 6  | PHE | 978 | 12 |
| tariquidar   | 7  | PHE | 978 | 12 |
| tariquidar   | 9  | PHE | 978 | 12 |
| tariquidar   | 10 | PHE | 978 | 12 |
| verapamil    | 3  | PHE | 978 | 12 |
| verapamil    | 4  | PHE | 978 | 12 |
| verapamil    | 5  | PHE | 978 | 12 |
| verapamil    | 6  | PHE | 978 | 12 |
| verapamil    | 7  | PHE | 978 | 12 |
| verapamil    | 9  | PHE | 978 | 12 |
| verapamil    | 10 | PHE | 978 | 12 |
| verapamil    | 21 | PHE | 978 | 12 |
| verapamil    | 22 | PHE | 978 | 12 |
| verapamil    | 23 | PHE | 978 | 12 |
| vinblastine  | 6  | PHE | 978 | 12 |
| vinblastine  | 7  | PHE | 978 | 12 |
| vinblastine  | 9  | PHE | 978 | 12 |
| vinblastine  | 10 | PHE | 978 | 12 |
| vinblastine  | 24 | PHE | 978 | 12 |
| zosuquidar   | 3  | PHE | 978 | 12 |
| zosuquidar   | 4  | PHE | 978 | 12 |
| zosuquidar   | 9  | PHE | 978 | 12 |
| zosuquidar   | 22 | PHE | 978 | 12 |
|              |    |     |     |    |
| 980          |    |     |     |    |
|              |    |     |     |    |
| 981          |    |     |     |    |
| doxorubicin  | 2  | VAL | 981 | 12 |
| doxorubicin  | 22 | VAL | 981 | 12 |
| hoechst33342 | 23 | VAL | 981 | 12 |
| QZ59S_RRR    | 0  | VAL | 981 | 12 |
| QZ59S_SSS    | 2  | VAL | 981 | 12 |
| rhodamine123 | 22 | VAL | 981 | 12 |
| rhodamine123 | 23 | VAL | 981 | 12 |
| saquinavir   | 23 | VAL | 981 | 12 |
| tamoxifen    | 22 | VAL | 981 | 12 |
| verapamil    | 22 | VAL | 981 | 12 |

|                       |    |     |     |    |
|-----------------------|----|-----|-----|----|
| verapamil             | 23 | VAL | 981 | 12 |
| zosuquidar            | 22 | VAL | 981 | 12 |
|                       |    |     |     |    |
| 982                   |    |     |     |    |
| biricodar             | 0  | VAL | 982 | 12 |
| biricodar             | 2  | VAL | 982 | 12 |
| biricodar             | 5  | VAL | 982 | 12 |
| biricodar             | 10 | VAL | 982 | 12 |
| biricodar             | 13 | VAL | 982 | 12 |
| biricodar             | 19 | VAL | 982 | 12 |
| biricodar             | 20 | VAL | 982 | 12 |
| cisZ-<br>flupenthixol | 0  | VAL | 982 | 12 |
| cisZ-<br>flupenthixol | 1  | VAL | 982 | 12 |
| cisZ-<br>flupenthixol | 6  | VAL | 982 | 12 |
| cisZ-<br>flupenthixol | 24 | VAL | 982 | 12 |
| cyclosporinA          | 7  | VAL | 982 | 12 |
| cyclosporinA          | 13 | VAL | 982 | 12 |
| daunorubicin          | 1  | VAL | 982 | 12 |
| daunorubicin          | 2  | VAL | 982 | 12 |
| daunorubicin          | 3  | VAL | 982 | 12 |
| daunorubicin          | 5  | VAL | 982 | 12 |
| daunorubicin          | 18 | VAL | 982 | 12 |
| doxorubicin           | 2  | VAL | 982 | 12 |
| doxorubicin           | 3  | VAL | 982 | 12 |
| doxorubicin           | 7  | VAL | 982 | 12 |
| doxorubicin           | 18 | VAL | 982 | 12 |
| doxorubicin           | 22 | VAL | 982 | 12 |
| elacridar             | 2  | VAL | 982 | 12 |
| elacridar             | 6  | VAL | 982 | 12 |
| elacridar             | 17 | VAL | 982 | 12 |
| elacridar             | 21 | VAL | 982 | 12 |
| hoechst33342          | 2  | VAL | 982 | 12 |
| hoechst33342          | 9  | VAL | 982 | 12 |
| hoechst33342          | 18 | VAL | 982 | 12 |
| hoechst33342          | 23 | VAL | 982 | 12 |
| hoechst33342          | 25 | VAL | 982 | 12 |
| ivermectin            | 0  | VAL | 982 | 12 |
| ivermectin            | 1  | VAL | 982 | 12 |
| ivermectin            | 3  | VAL | 982 | 12 |
| ivermectin            | 19 | VAL | 982 | 12 |
| ivermectin            | 20 | VAL | 982 | 12 |
| ivermectin            | 21 | VAL | 982 | 12 |
| ivermectin            | 23 | VAL | 982 | 12 |
| lopinavir             | 3  | VAL | 982 | 12 |
| paclitaxel            | 10 | VAL | 982 | 12 |
| QZ59S_RRR             | 1  | VAL | 982 | 12 |
| QZ59S_RRR             | 6  | VAL | 982 | 12 |
| QZ59S_RRR             | 14 | VAL | 982 | 12 |

|              |    |     |     |    |
|--------------|----|-----|-----|----|
| QZ59S_RRR    | 21 | VAL | 982 | 12 |
| QZ59S_SSS    | 0  | VAL | 982 | 12 |
| QZ59S_SSS    | 2  | VAL | 982 | 12 |
| QZ59S_SSS    | 4  | VAL | 982 | 12 |
| QZ59S_SSS    | 5  | VAL | 982 | 12 |
| QZ59S_SSS    | 6  | VAL | 982 | 12 |
| QZ59S_SSS    | 21 | VAL | 982 | 12 |
| QZ59S_SSS    | 22 | VAL | 982 | 12 |
| rhodamine123 | 1  | VAL | 982 | 12 |
| rhodamine123 | 21 | VAL | 982 | 12 |
| rhodamine123 | 22 | VAL | 982 | 12 |
| rhodamine123 | 23 | VAL | 982 | 12 |
| ritonavir    | 4  | VAL | 982 | 12 |
| ritonavir    | 12 | VAL | 982 | 12 |
| saquinavir   | 3  | VAL | 982 | 12 |
| saquinavir   | 4  | VAL | 982 | 12 |
| saquinavir   | 10 | VAL | 982 | 12 |
| saquinavir   | 14 | VAL | 982 | 12 |
| saquinavir   | 18 | VAL | 982 | 12 |
| saquinavir   | 23 | VAL | 982 | 12 |
| tamoxifen    | 1  | VAL | 982 | 12 |
| tamoxifen    | 2  | VAL | 982 | 12 |
| tamoxifen    | 3  | VAL | 982 | 12 |
| tamoxifen    | 19 | VAL | 982 | 12 |
| tamoxifen    | 21 | VAL | 982 | 12 |
| tamoxifen    | 22 | VAL | 982 | 12 |
| tamoxifen    | 23 | VAL | 982 | 12 |
| tariquidar   | 0  | VAL | 982 | 12 |
| tariquidar   | 4  | VAL | 982 | 12 |
| tariquidar   | 6  | VAL | 982 | 12 |
| tariquidar   | 7  | VAL | 982 | 12 |
| tariquidar   | 10 | VAL | 982 | 12 |
| tariquidar   | 17 | VAL | 982 | 12 |
| tariquidar   | 21 | VAL | 982 | 12 |
| valspodar    | 5  | VAL | 982 | 12 |
| valspodar    | 7  | VAL | 982 | 12 |
| valspodar    | 8  | VAL | 982 | 12 |
| verapamil    | 2  | VAL | 982 | 12 |
| verapamil    | 4  | VAL | 982 | 12 |
| verapamil    | 10 | VAL | 982 | 12 |
| verapamil    | 16 | VAL | 982 | 12 |
| verapamil    | 18 | VAL | 982 | 12 |
| verapamil    | 21 | VAL | 982 | 12 |
| verapamil    | 22 | VAL | 982 | 12 |
| verapamil    | 23 | VAL | 982 | 12 |
| vinblastine  | 2  | VAL | 982 | 12 |
| vinblastine  | 6  | VAL | 982 | 12 |
| vinblastine  | 9  | VAL | 982 | 12 |
| vinblastine  | 10 | VAL | 982 | 12 |
| vinblastine  | 24 | VAL | 982 | 12 |
| zosuquidar   | 1  | VAL | 982 | 12 |
| zosuquidar   | 3  | VAL | 982 | 12 |



|              |    |     |     |    |
|--------------|----|-----|-----|----|
| zosuquidar   | 20 | VAL | 982 | 12 |
| zosuquidar   | 22 | VAL | 982 | 12 |
|              |    |     |     |    |
| 984          |    |     |     |    |
| vinblastine  | 2  | GLY | 984 | 12 |
|              |    |     |     |    |
| 985          |    |     |     |    |
| biricodar    | 0  | ALA | 985 | 12 |
| biricodar    | 2  | ALA | 985 | 12 |
| biricodar    | 19 | ALA | 985 | 12 |
| cyclosporinA | 3  | ALA | 985 | 12 |
| cyclosporinA | 4  | ALA | 985 | 12 |
| cyclosporinA | 13 | ALA | 985 | 12 |
| cyclosporinA | 22 | ALA | 985 | 12 |
| daunorubicin | 18 | ALA | 985 | 12 |
| daunorubicin | 21 | ALA | 985 | 12 |
| doxorubicin  | 1  | ALA | 985 | 12 |
| doxorubicin  | 18 | ALA | 985 | 12 |
| hoechst33342 | 10 | ALA | 985 | 12 |
| hoechst33342 | 23 | ALA | 985 | 12 |
| hoechst33342 | 25 | ALA | 985 | 12 |
| ivermectin   | 4  | ALA | 985 | 12 |
| ivermectin   | 13 | ALA | 985 | 12 |
| lopinavir    | 1  | ALA | 985 | 12 |
| QZ59S_RRR    | 0  | ALA | 985 | 12 |
| QZ59S_RRR    | 21 | ALA | 985 | 12 |
| QZ59S_SSS    | 0  | ALA | 985 | 12 |
| QZ59S_SSS    | 2  | ALA | 985 | 12 |
| QZ59S_SSS    | 21 | ALA | 985 | 12 |
| QZ59S_SSS    | 22 | ALA | 985 | 12 |
| rhodamine123 | 23 | ALA | 985 | 12 |
| ritonavir    | 0  | ALA | 985 | 12 |
| ritonavir    | 1  | ALA | 985 | 12 |
| ritonavir    | 3  | ALA | 985 | 12 |
| ritonavir    | 4  | ALA | 985 | 12 |
| ritonavir    | 17 | ALA | 985 | 12 |
| ritonavir    | 22 | ALA | 985 | 12 |
| ritonavir    | 23 | ALA | 985 | 12 |
| saquinavir   | 0  | ALA | 985 | 12 |
| saquinavir   | 2  | ALA | 985 | 12 |
| saquinavir   | 11 | ALA | 985 | 12 |
| saquinavir   | 14 | ALA | 985 | 12 |
| saquinavir   | 17 | ALA | 985 | 12 |
| saquinavir   | 18 | ALA | 985 | 12 |
| saquinavir   | 19 | ALA | 985 | 12 |
| saquinavir   | 23 | ALA | 985 | 12 |
| tamoxifen    | 23 | ALA | 985 | 12 |
| tariquidar   | 17 | ALA | 985 | 12 |
| tariquidar   | 21 | ALA | 985 | 12 |
| valspodar    | 3  | ALA | 985 | 12 |
| valspodar    | 5  | ALA | 985 | 12 |
| valspodar    | 13 | ALA | 985 | 12 |

|              |    |     |     |    |
|--------------|----|-----|-----|----|
| verapamil    | 23 | ALA | 985 | 12 |
| vinblastine  | 2  | ALA | 985 | 12 |
| vinblastine  | 22 | ALA | 985 | 12 |
|              |    |     |     |    |
| 986          |    |     |     |    |
| biricodar    | 0  | MET | 986 | 12 |
| biricodar    | 2  | MET | 986 | 12 |
| biricodar    | 3  | MET | 986 | 12 |
| biricodar    | 13 | MET | 986 | 12 |
| biricodar    | 18 | MET | 986 | 12 |
| biricodar    | 19 | MET | 986 | 12 |
| biricodar    | 23 | MET | 986 | 12 |
| biricodar    | 24 | MET | 986 | 12 |
| cyclosporinA | 3  | MET | 986 | 12 |
| cyclosporinA | 5  | MET | 986 | 12 |
| cyclosporinA | 7  | MET | 986 | 12 |
| cyclosporinA | 9  | MET | 986 | 12 |
| cyclosporinA | 12 | MET | 986 | 12 |
| cyclosporinA | 13 | MET | 986 | 12 |
| cyclosporinA | 14 | MET | 986 | 12 |
| cyclosporinA | 15 | MET | 986 | 12 |
| cyclosporinA | 17 | MET | 986 | 12 |
| cyclosporinA | 19 | MET | 986 | 12 |
| cyclosporinA | 22 | MET | 986 | 12 |
| cyclosporinA | 23 | MET | 986 | 12 |
| cyclosporinA | 24 | MET | 986 | 12 |
| cyclosporinA | 25 | MET | 986 | 12 |
| daunorubicin | 4  | MET | 986 | 12 |
| daunorubicin | 18 | MET | 986 | 12 |
| daunorubicin | 20 | MET | 986 | 12 |
| daunorubicin | 21 | MET | 986 | 12 |
| doxorubicin  | 18 | MET | 986 | 12 |
| elacridar    | 1  | MET | 986 | 12 |
| elacridar    | 17 | MET | 986 | 12 |
| elacridar    | 18 | MET | 986 | 12 |
| elacridar    | 20 | MET | 986 | 12 |
| elacridar    | 21 | MET | 986 | 12 |
| hoechst33342 | 10 | MET | 986 | 12 |
| hoechst33342 | 23 | MET | 986 | 12 |
| hoechst33342 | 25 | MET | 986 | 12 |
| ivermectin   | 0  | MET | 986 | 12 |
| ivermectin   | 1  | MET | 986 | 12 |
| ivermectin   | 3  | MET | 986 | 12 |
| ivermectin   | 4  | MET | 986 | 12 |
| ivermectin   | 6  | MET | 986 | 12 |
| ivermectin   | 8  | MET | 986 | 12 |
| ivermectin   | 14 | MET | 986 | 12 |
| ivermectin   | 15 | MET | 986 | 12 |
| ivermectin   | 16 | MET | 986 | 12 |
| ivermectin   | 17 | MET | 986 | 12 |
| ivermectin   | 19 | MET | 986 | 12 |
| ivermectin   | 20 | MET | 986 | 12 |

|              |    |     |     |    |
|--------------|----|-----|-----|----|
| ivermectin   | 21 | MET | 986 | 12 |
| ivermectin   | 23 | MET | 986 | 12 |
| ivermectin   | 24 | MET | 986 | 12 |
| lopinavir    | 1  | MET | 986 | 12 |
| lopinavir    | 3  | MET | 986 | 12 |
| lopinavir    | 7  | MET | 986 | 12 |
| lopinavir    | 16 | MET | 986 | 12 |
| lopinavir    | 17 | MET | 986 | 12 |
| lopinavir    | 20 | MET | 986 | 12 |
| lopinavir    | 22 | MET | 986 | 12 |
| paclitaxel   | 0  | MET | 986 | 12 |
| paclitaxel   | 2  | MET | 986 | 12 |
| paclitaxel   | 3  | MET | 986 | 12 |
| paclitaxel   | 10 | MET | 986 | 12 |
| paclitaxel   | 16 | MET | 986 | 12 |
| paclitaxel   | 18 | MET | 986 | 12 |
| paclitaxel   | 20 | MET | 986 | 12 |
| paclitaxel   | 21 | MET | 986 | 12 |
| paclitaxel   | 24 | MET | 986 | 12 |
| paclitaxel   | 25 | MET | 986 | 12 |
| QZ59S_RRR    | 0  | MET | 986 | 12 |
| QZ59S_RRR    | 3  | MET | 986 | 12 |
| QZ59S_RRR    | 14 | MET | 986 | 12 |
| QZ59S_RRR    | 19 | MET | 986 | 12 |
| QZ59S_RRR    | 21 | MET | 986 | 12 |
| QZ59S_RRR    | 23 | MET | 986 | 12 |
| QZ59S_RRR    | 24 | MET | 986 | 12 |
| QZ59S_RRR    | 25 | MET | 986 | 12 |
| QZ59S_SSS    | 0  | MET | 986 | 12 |
| QZ59S_SSS    | 4  | MET | 986 | 12 |
| QZ59S_SSS    | 15 | MET | 986 | 12 |
| QZ59S_SSS    | 16 | MET | 986 | 12 |
| QZ59S_SSS    | 17 | MET | 986 | 12 |
| QZ59S_SSS    | 18 | MET | 986 | 12 |
| QZ59S_SSS    | 21 | MET | 986 | 12 |
| QZ59S_SSS    | 22 | MET | 986 | 12 |
| rhodamine123 | 1  | MET | 986 | 12 |
| rhodamine123 | 2  | MET | 986 | 12 |
| rhodamine123 | 23 | MET | 986 | 12 |
| ritonavir    | 0  | MET | 986 | 12 |
| ritonavir    | 1  | MET | 986 | 12 |
| ritonavir    | 4  | MET | 986 | 12 |
| ritonavir    | 6  | MET | 986 | 12 |
| ritonavir    | 10 | MET | 986 | 12 |
| ritonavir    | 12 | MET | 986 | 12 |
| ritonavir    | 13 | MET | 986 | 12 |
| ritonavir    | 16 | MET | 986 | 12 |
| ritonavir    | 17 | MET | 986 | 12 |
| ritonavir    | 18 | MET | 986 | 12 |
| ritonavir    | 19 | MET | 986 | 12 |
| ritonavir    | 20 | MET | 986 | 12 |
| ritonavir    | 22 | MET | 986 | 12 |

|              |    |     |     |    |
|--------------|----|-----|-----|----|
| saquinavir   | 0  | MET | 986 | 12 |
| saquinavir   | 1  | MET | 986 | 12 |
| saquinavir   | 2  | MET | 986 | 12 |
| saquinavir   | 3  | MET | 986 | 12 |
| saquinavir   | 4  | MET | 986 | 12 |
| saquinavir   | 11 | MET | 986 | 12 |
| saquinavir   | 14 | MET | 986 | 12 |
| saquinavir   | 17 | MET | 986 | 12 |
| saquinavir   | 18 | MET | 986 | 12 |
| saquinavir   | 19 | MET | 986 | 12 |
| saquinavir   | 20 | MET | 986 | 12 |
| saquinavir   | 23 | MET | 986 | 12 |
| tamoxifen    | 1  | MET | 986 | 12 |
| tamoxifen    | 4  | MET | 986 | 12 |
| tamoxifen    | 20 | MET | 986 | 12 |
| tamoxifen    | 21 | MET | 986 | 12 |
| tariquidar   | 0  | MET | 986 | 12 |
| tariquidar   | 7  | MET | 986 | 12 |
| tariquidar   | 11 | MET | 986 | 12 |
| tariquidar   | 16 | MET | 986 | 12 |
| tariquidar   | 21 | MET | 986 | 12 |
| valspodar    | 3  | MET | 986 | 12 |
| valspodar    | 5  | MET | 986 | 12 |
| valspodar    | 7  | MET | 986 | 12 |
| valspodar    | 8  | MET | 986 | 12 |
| valspodar    | 9  | MET | 986 | 12 |
| valspodar    | 10 | MET | 986 | 12 |
| valspodar    | 13 | MET | 986 | 12 |
| valspodar    | 14 | MET | 986 | 12 |
| valspodar    | 15 | MET | 986 | 12 |
| valspodar    | 16 | MET | 986 | 12 |
| valspodar    | 18 | MET | 986 | 12 |
| valspodar    | 23 | MET | 986 | 12 |
| valspodar    | 24 | MET | 986 | 12 |
| verapamil    | 0  | MET | 986 | 12 |
| verapamil    | 1  | MET | 986 | 12 |
| verapamil    | 16 | MET | 986 | 12 |
| vinblastine  | 1  | MET | 986 | 12 |
| vinblastine  | 3  | MET | 986 | 12 |
| vinblastine  | 4  | MET | 986 | 12 |
| vinblastine  | 8  | MET | 986 | 12 |
| vinblastine  | 22 | MET | 986 | 12 |
| zosuquidar   | 13 | MET | 986 | 12 |
|              |    |     |     |    |
| 989          |    |     |     |    |
| biricodar    | 19 | GLY | 989 | 12 |
| biricodar    | 24 | GLY | 989 | 12 |
| cyclosporinA | 3  | GLY | 989 | 12 |
| cyclosporinA | 12 | GLY | 989 | 12 |
| cyclosporinA | 13 | GLY | 989 | 12 |
| cyclosporinA | 22 | GLY | 989 | 12 |
| cyclosporinA | 23 | GLY | 989 | 12 |

|              |    |     |     |    |
|--------------|----|-----|-----|----|
| cyclosporinA | 24 | GLY | 989 | 12 |
| daunorubicin | 18 | GLY | 989 | 12 |
| daunorubicin | 21 | GLY | 989 | 12 |
| doxorubicin  | 18 | GLY | 989 | 12 |
| elacridar    | 11 | GLY | 989 | 12 |
| hoechst33342 | 10 | GLY | 989 | 12 |
| hoechst33342 | 23 | GLY | 989 | 12 |
| hoechst33342 | 25 | GLY | 989 | 12 |
| ivermectin   | 4  | GLY | 989 | 12 |
| ivermectin   | 8  | GLY | 989 | 12 |
| ivermectin   | 24 | GLY | 989 | 12 |
| lopinavir    | 20 | GLY | 989 | 12 |
| lopinavir    | 22 | GLY | 989 | 12 |
| lopinavir    | 23 | GLY | 989 | 12 |
| paclitaxel   | 2  | GLY | 989 | 12 |
| paclitaxel   | 21 | GLY | 989 | 12 |
| paclitaxel   | 24 | GLY | 989 | 12 |
| paclitaxel   | 25 | GLY | 989 | 12 |
| QZ59S_RRR    | 21 | GLY | 989 | 12 |
| QZ59S_RRR    | 24 | GLY | 989 | 12 |
| QZ59S_RRR    | 25 | GLY | 989 | 12 |
| QZ59S_SSS    | 0  | GLY | 989 | 12 |
| QZ59S_SSS    | 18 | GLY | 989 | 12 |
| QZ59S_SSS    | 21 | GLY | 989 | 12 |
| QZ59S_SSS    | 22 | GLY | 989 | 12 |
| ritonavir    | 0  | GLY | 989 | 12 |
| ritonavir    | 1  | GLY | 989 | 12 |
| ritonavir    | 3  | GLY | 989 | 12 |
| ritonavir    | 17 | GLY | 989 | 12 |
| ritonavir    | 22 | GLY | 989 | 12 |
| ritonavir    | 23 | GLY | 989 | 12 |
| saquinavir   | 0  | GLY | 989 | 12 |
| saquinavir   | 1  | GLY | 989 | 12 |
| saquinavir   | 2  | GLY | 989 | 12 |
| saquinavir   | 11 | GLY | 989 | 12 |
| saquinavir   | 17 | GLY | 989 | 12 |
| saquinavir   | 18 | GLY | 989 | 12 |
| saquinavir   | 19 | GLY | 989 | 12 |
| saquinavir   | 21 | GLY | 989 | 12 |
| saquinavir   | 23 | GLY | 989 | 12 |
| saquinavir   | 25 | GLY | 989 | 12 |
| tariquidar   | 11 | GLY | 989 | 12 |
| tariquidar   | 17 | GLY | 989 | 12 |
| tariquidar   | 21 | GLY | 989 | 12 |
| valspodar    | 3  | GLY | 989 | 12 |
| valspodar    | 23 | GLY | 989 | 12 |
| verapamil    | 0  | GLY | 989 | 12 |
| verapamil    | 17 | GLY | 989 | 12 |
| vinblastine  | 3  | GLY | 989 | 12 |
| vinblastine  | 4  | GLY | 989 | 12 |
| vinblastine  | 19 | GLY | 989 | 12 |
| vinblastine  | 20 | GLY | 989 | 12 |

|              |    |     |     |    |
|--------------|----|-----|-----|----|
| vinblastine  | 22 | GLY | 989 | 12 |
|              |    |     |     |    |
| 993          |    |     |     |    |
| ADP          | 6  | SER | 993 | 12 |
| ADP          | 8  | SER | 993 | 12 |
| ADP          | 9  | SER | 993 | 12 |
| ADP          | 10 | SER | 993 | 12 |
| biricodar    | 1  | SER | 993 | 12 |
| biricodar    | 17 | SER | 993 | 12 |
| biricodar    | 24 | SER | 993 | 12 |
| biricodar    | 25 | SER | 993 | 12 |
| cyclosporinA | 0  | SER | 993 | 12 |
| cyclosporinA | 1  | SER | 993 | 12 |
| cyclosporinA | 3  | SER | 993 | 12 |
| cyclosporinA | 5  | SER | 993 | 12 |
| cyclosporinA | 6  | SER | 993 | 12 |
| cyclosporinA | 9  | SER | 993 | 12 |
| cyclosporinA | 12 | SER | 993 | 12 |
| cyclosporinA | 15 | SER | 993 | 12 |
| cyclosporinA | 16 | SER | 993 | 12 |
| cyclosporinA | 19 | SER | 993 | 12 |
| cyclosporinA | 22 | SER | 993 | 12 |
| cyclosporinA | 23 | SER | 993 | 12 |
| cyclosporinA | 24 | SER | 993 | 12 |
| cyclosporinA | 25 | SER | 993 | 12 |
| daunorubicin | 21 | SER | 993 | 12 |
| daunorubicin | 24 | SER | 993 | 12 |
| doxorubicin  | 0  | SER | 993 | 12 |
| doxorubicin  | 4  | SER | 993 | 12 |
| doxorubicin  | 6  | SER | 993 | 12 |
| doxorubicin  | 21 | SER | 993 | 12 |
| doxorubicin  | 24 | SER | 993 | 12 |
| elacridar    | 0  | SER | 993 | 12 |
| elacridar    | 11 | SER | 993 | 12 |
| elacridar    | 24 | SER | 993 | 12 |
| hoechst33342 | 23 | SER | 993 | 12 |
| hoechst33342 | 24 | SER | 993 | 12 |
| hoechst33342 | 25 | SER | 993 | 12 |
| ivermectin   | 2  | SER | 993 | 12 |
| ivermectin   | 10 | SER | 993 | 12 |
| ivermectin   | 16 | SER | 993 | 12 |
| ivermectin   | 24 | SER | 993 | 12 |
| ivermectin   | 25 | SER | 993 | 12 |
| lopinavir    | 2  | SER | 993 | 12 |
| lopinavir    | 4  | SER | 993 | 12 |
| lopinavir    | 9  | SER | 993 | 12 |
| lopinavir    | 19 | SER | 993 | 12 |
| lopinavir    | 20 | SER | 993 | 12 |
| lopinavir    | 21 | SER | 993 | 12 |
| lopinavir    | 22 | SER | 993 | 12 |
| lopinavir    | 23 | SER | 993 | 12 |
| lopinavir    | 24 | SER | 993 | 12 |

|             |    |     |     |    |
|-------------|----|-----|-----|----|
| paclitaxel  | 0  | SER | 993 | 12 |
| paclitaxel  | 1  | SER | 993 | 12 |
| paclitaxel  | 9  | SER | 993 | 12 |
| paclitaxel  | 16 | SER | 993 | 12 |
| paclitaxel  | 21 | SER | 993 | 12 |
| paclitaxel  | 24 | SER | 993 | 12 |
| paclitaxel  | 25 | SER | 993 | 12 |
| QZ59S_RRR   | 22 | SER | 993 | 12 |
| QZ59S_RRR   | 23 | SER | 993 | 12 |
| QZ59S_RRR   | 24 | SER | 993 | 12 |
| QZ59S_RRR   | 25 | SER | 993 | 12 |
| QZ59S_SSS   | 18 | SER | 993 | 12 |
| QZ59S_SSS   | 25 | SER | 993 | 12 |
| ritonavir   | 0  | SER | 993 | 12 |
| ritonavir   | 2  | SER | 993 | 12 |
| ritonavir   | 17 | SER | 993 | 12 |
| ritonavir   | 20 | SER | 993 | 12 |
| ritonavir   | 23 | SER | 993 | 12 |
| ritonavir   | 24 | SER | 993 | 12 |
| ritonavir   | 25 | SER | 993 | 12 |
| saquinavir  | 1  | SER | 993 | 12 |
| saquinavir  | 11 | SER | 993 | 12 |
| saquinavir  | 15 | SER | 993 | 12 |
| saquinavir  | 17 | SER | 993 | 12 |
| saquinavir  | 18 | SER | 993 | 12 |
| saquinavir  | 19 | SER | 993 | 12 |
| saquinavir  | 21 | SER | 993 | 12 |
| saquinavir  | 24 | SER | 993 | 12 |
| tariquidar  | 1  | SER | 993 | 12 |
| tariquidar  | 5  | SER | 993 | 12 |
| tariquidar  | 11 | SER | 993 | 12 |
| tariquidar  | 24 | SER | 993 | 12 |
| tariquidar  | 25 | SER | 993 | 12 |
| valspodar   | 0  | SER | 993 | 12 |
| valspodar   | 1  | SER | 993 | 12 |
| valspodar   | 2  | SER | 993 | 12 |
| valspodar   | 3  | SER | 993 | 12 |
| valspodar   | 4  | SER | 993 | 12 |
| valspodar   | 6  | SER | 993 | 12 |
| valspodar   | 13 | SER | 993 | 12 |
| valspodar   | 14 | SER | 993 | 12 |
| valspodar   | 16 | SER | 993 | 12 |
| valspodar   | 18 | SER | 993 | 12 |
| valspodar   | 23 | SER | 993 | 12 |
| valspodar   | 24 | SER | 993 | 12 |
| verapamil   | 0  | SER | 993 | 12 |
| verapamil   | 19 | SER | 993 | 12 |
| vinblastine | 15 | SER | 993 | 12 |
| vinblastine | 17 | SER | 993 | 12 |
| vinblastine | 18 | SER | 993 | 12 |
| vinblastine | 19 | SER | 993 | 12 |
| vinblastine | 20 | SER | 993 | 12 |

|             |    |     |     |    |
|-------------|----|-----|-----|----|
| vinblastine | 21 | SER | 993 | 12 |
| vinblastine | 22 | SER | 993 | 12 |
| vinblastine | 25 | SER | 993 | 12 |
